# Supplementary material for: N-heterocyclic carbene-catalyzed oxidation of aldehydes for the synthesis of amides via phenolic esters
Source: Royal Society of Chemistry journal article supplement (doi:10.1039/c4ra04012k), 2014-01-01

## Supporting Information

### Experimental section

**General.** Anhydrous solvents were transferred by an oven dried syringe. Dichloromethane was distilled from calcium hydride. Proton nuclear magnetic resonance ( $^1\text{H}$  NMR) spectra were recorded with a Varian Mercury plus (400 MHz) spectrometer. Chemical shifts are reported in delta ( $\delta$ ) units, part per million (ppm) downfield from trimethylsilane. Coupling constants are reported in Hertz (Hz). Carbon-13 nuclear magnetic resonance ( $^{13}\text{C}$  NMR) spectra were recorded with a Varian Mercury plus (100 MHz) spectrometer. Chemical shifts are reported in delta ( $\delta$ ) units, part per million (ppm) relative to the center of the triplet at 77.00 ppm for deuteriochloroform.

**Representative procedure for the reaction:** TEMPO (156.3 mg, 1.0 mmol) and 1,3-bis(2,6-diisopropylphenyl)-1,3-dihydro-2*H*-imidazol-2-ylidene (19.4 mg, 0.05 mmol) was added to a solution of cinnamaldehyde (66.1 mg, 0.5 mmol) and phenol (47.1 mg, 0.5 mmol) in toluene (0.5 M, 1 ml) under nitrogen atmosphere. The reaction mixture was stirred at 100°C for 4h until consumption of starting aldehyde. Then, benzylamine (109.2 mg, 1.0 mmol) was added to the reaction vessel and the reaction mixture was stirred at 40°C for 18h. The solvent was removed under vacuum, the residue was purified by flash silica gel column chromatography by using 20% ethyl acetate/hexane as an eluent to obtain *N*-benzylcinnamamide **1c** (71.1 mg, 60 %).

**N-benzylcinnamamide (1b):** The representative experimental procedure was applied to cinnamaldehyde **1a** (66.1 mg, 0.5 mmol) and benzylamine (107.2 mg, 1.0 mmol) to yield **1b** (71.1 mg, 60 %).

**<sup>1</sup>H NMR** (400 MHz, CDCl<sub>3</sub>): δ 7.65 (d, 1H, *J* = 15.2 Hz), 7.44 (m, 2H), 7.28 (m, 8H), 6.67 (s, 1H), 6.52 (d, 1H, *J* = 15.6 Hz), 4.52 (d, 2H, *J* = 5.2 Hz) ppm

**<sup>13</sup>C NMR** (100 MHz, CDCl<sub>3</sub>): δ 165.9, 140.9, 138.2, 134.7, 129.5, 128.7, 128.5, 127.7(2C), 127.3, 120.7, 43.8 ppm

**IR** (neat, cm<sup>-1</sup>): 3054, 2987, 1670, 1628, 1514, 1265

**HRMS:** C<sub>16</sub>H<sub>15</sub>NO Calcd : 237.1154, [M]<sup>+</sup> Found : 237.1154

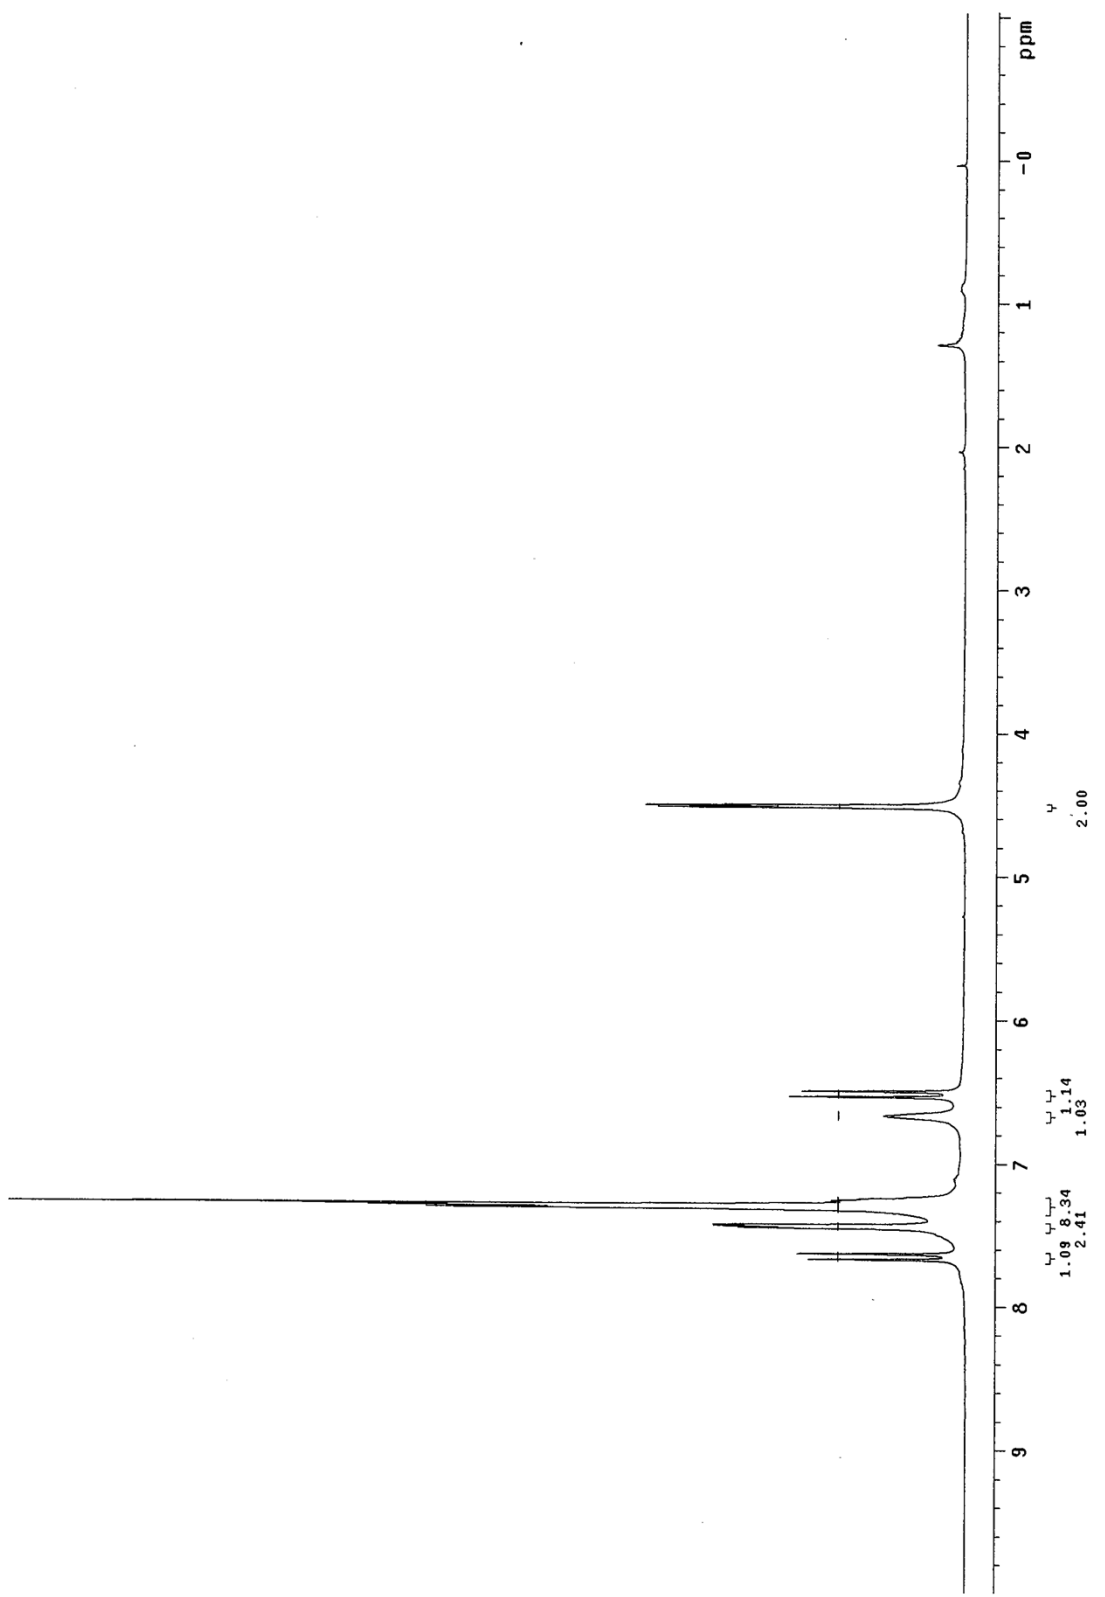

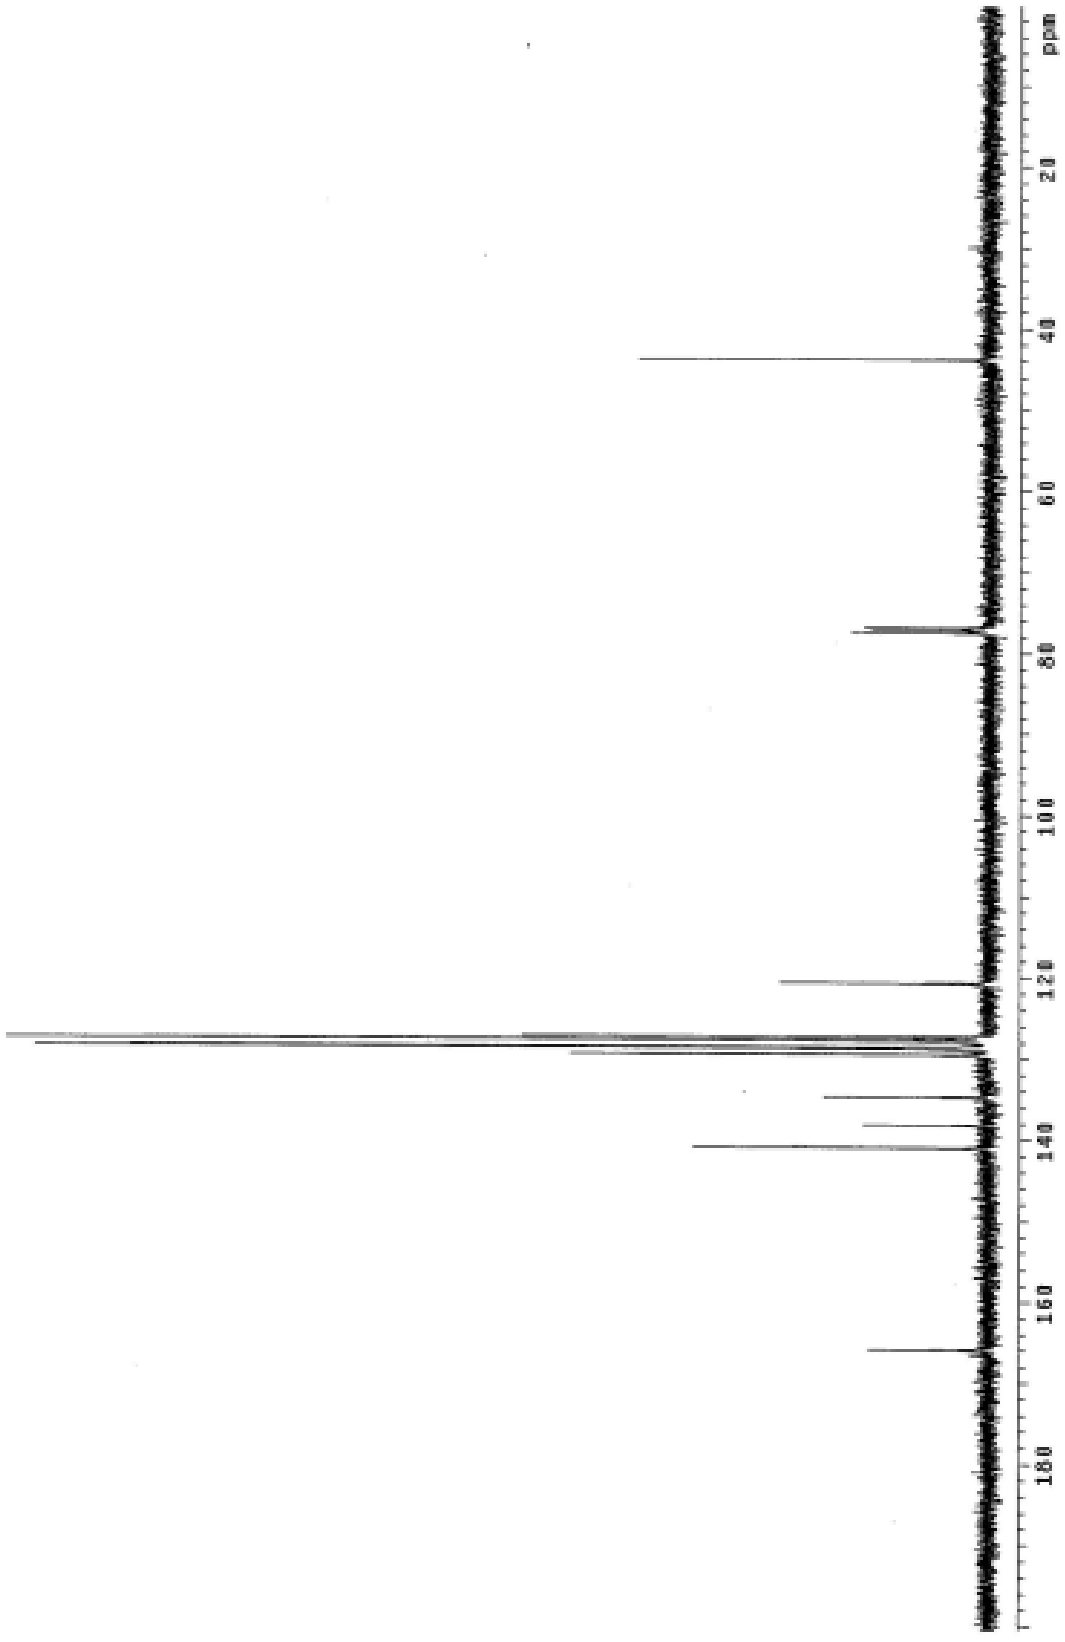

***N*-(4-methylbenzyl)cinnamamide (2b)**: The representative experimental procedure was applied to cinnamaldehyde **1a** (66.1 mg, 0.5 mmol) and 4-Methylbenzylamine (121.2 mg, 1.0 mmol) to yield **2b** (68.8 mg, 55 %).

**<sup>1</sup>H NMR** (400 MHz, CDCl<sub>3</sub>): δ 7.65 (d, 1H, *J* = 15.6 Hz), 7.45 (dd, 2H, *J* = 4.0, 2.4 Hz), 7.32 (m, 3H), 7.20 (d, 2H, *J* = 7.6 Hz), 7.12 (d, 2H, *J* = 8.0 Hz), 6.47 (d, 1H, *J* = 15.6 Hz), 6.38 (s, 1H), 4.49 (d, 2H, *J* = 4.4 Hz), 2.32 (s, 3H) ppm

**<sup>13</sup>C NMR** (100 MHz, CDCl<sub>3</sub>): δ 165.7, 141.0, 137.1, 135.2, 134.8, 129.6, 129.3, 128.7, 127.8(2C), 120.7, 43.7, 43.6, 21.3 ppm

**IR** (neat, cm<sup>-1</sup>): 3259, 3060, 2924, 1617, 1515

**HRMS**: C<sub>17</sub>H<sub>17</sub>NO Calcd : 251.1310, [M]<sup>+</sup> Found : 251.1312

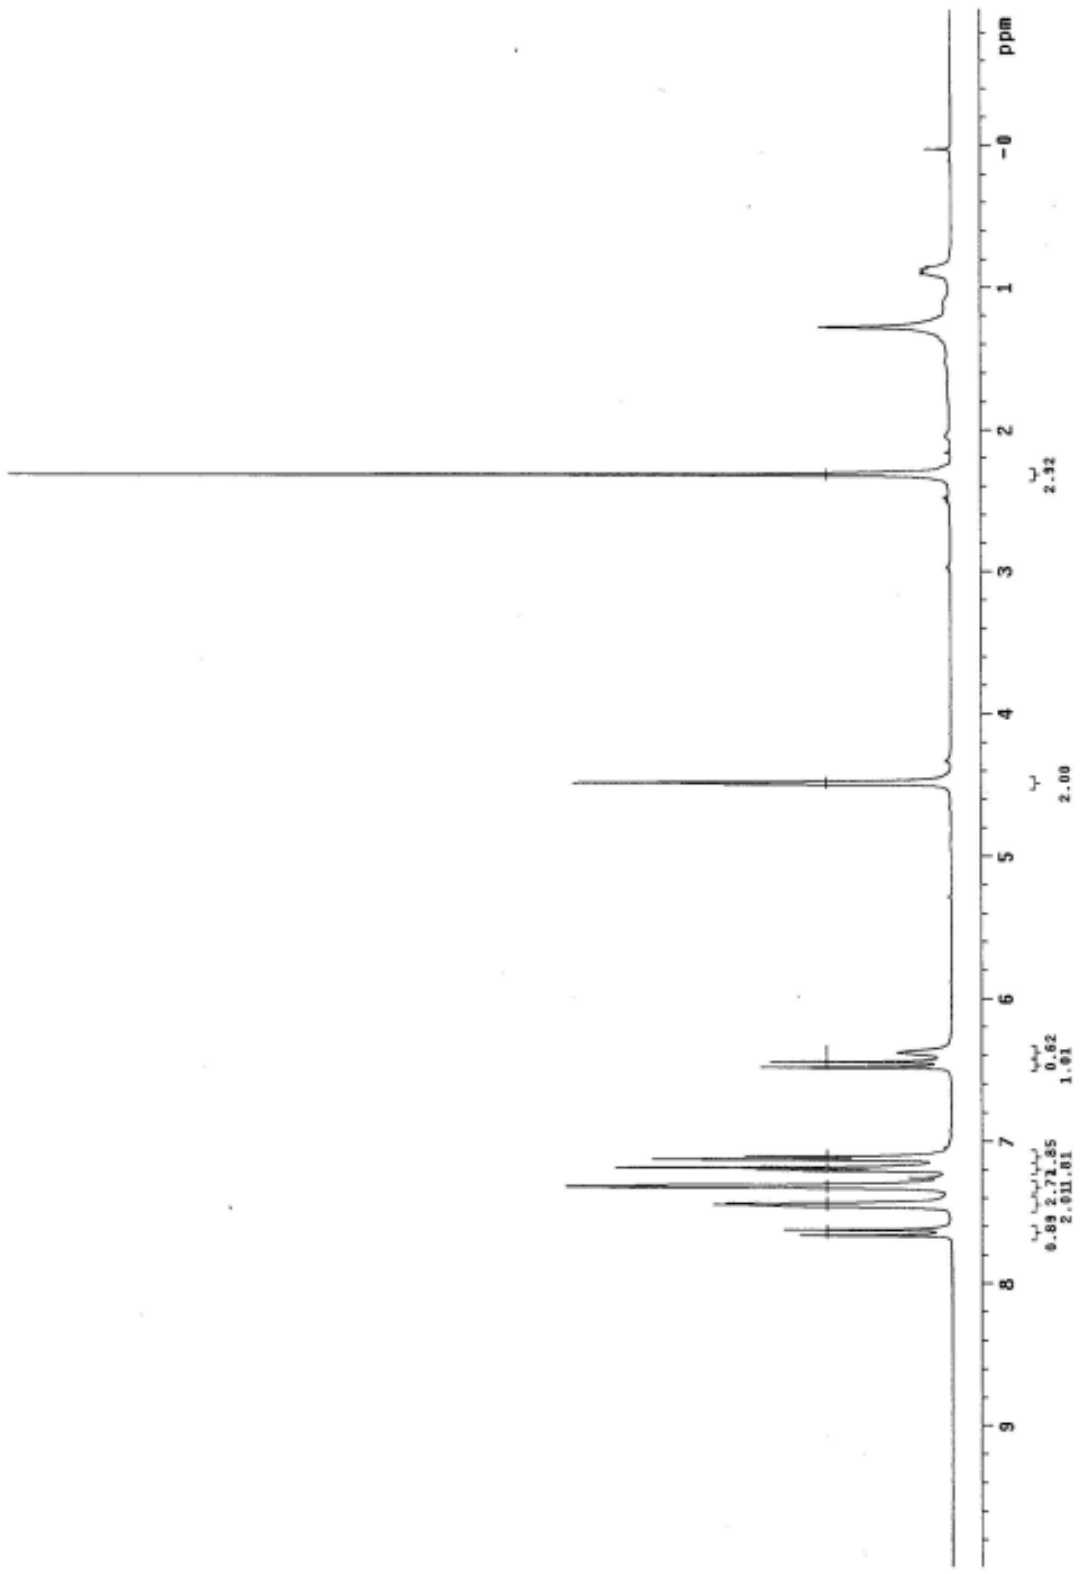

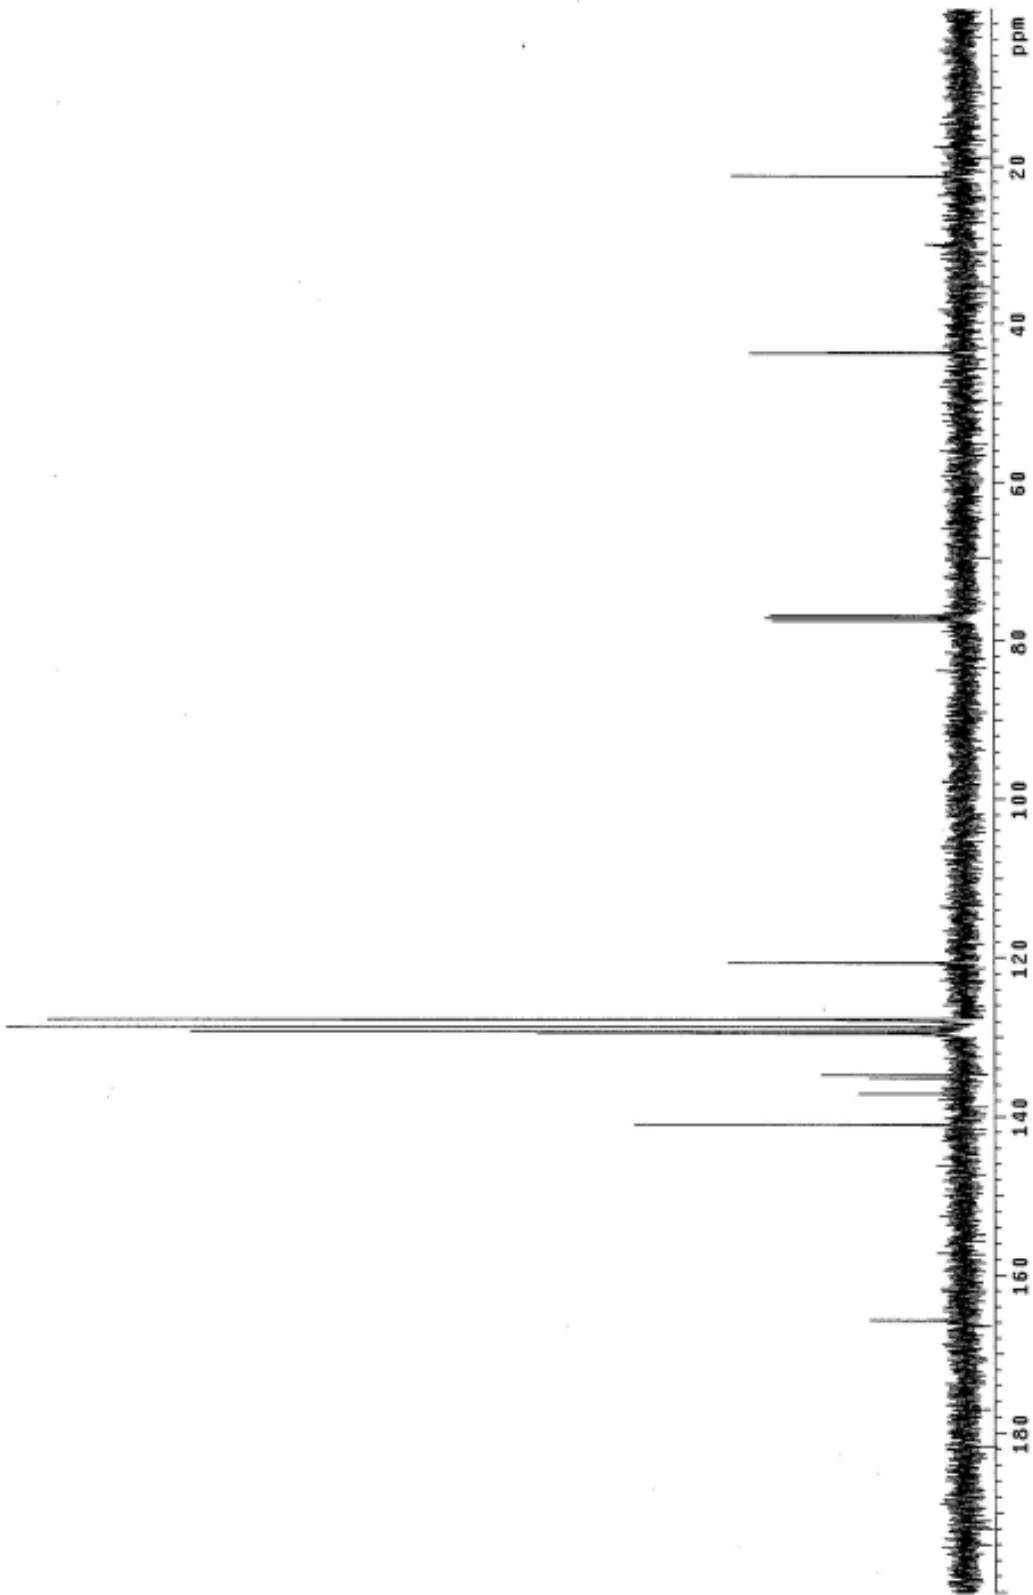

***N*-(4-methoxybenzyl)cinnamamide (3b)**: The representative experimental procedure was applied to cinnamaldehyde **1a** (66.1 mg, 0.5 mmol) and 4-methoxybenzylamine (137.2 mg, 1.0 mmol) to yield **3b** (79.3 mg, 59 %).

**<sup>1</sup>H NMR** (400 MHz, CDCl<sub>3</sub>): δ 7.65 (d, 1H, *J* = 16.0 Hz), 7.47 (dd, 2H, *J* = 8.0, 4.4 Hz), 7.33 (m, 3H), 7.24 (d, 2H, *J* = 8.4 Hz), 6.86 (d, 2H, *J* = 8.8 Hz), 6.41 (d, 1H, *J* = 15.6 Hz), 6.04 (s, 1H), 4.49 (d, 2H, *J* = 5.6 Hz), 3.78 (s, 3H) ppm

**<sup>13</sup>C NMR** (100 MHz, CDCl<sub>3</sub>): δ 165.6, 158.9, 141.0, 134.8, 130.3, 129.6, 129.2, 128.7, 127.7, 120.6, 114.1, 55.4, 43.4, 43.3 ppm

**IR** (neat, cm<sup>-1</sup>): 3298, 2927, 1653, 1614, 1512, 1248

**HRMS**: C<sub>17</sub>H<sub>17</sub>NO<sub>2</sub> Calcd : 267.1259, [M]<sup>+</sup> Found : 267.1259



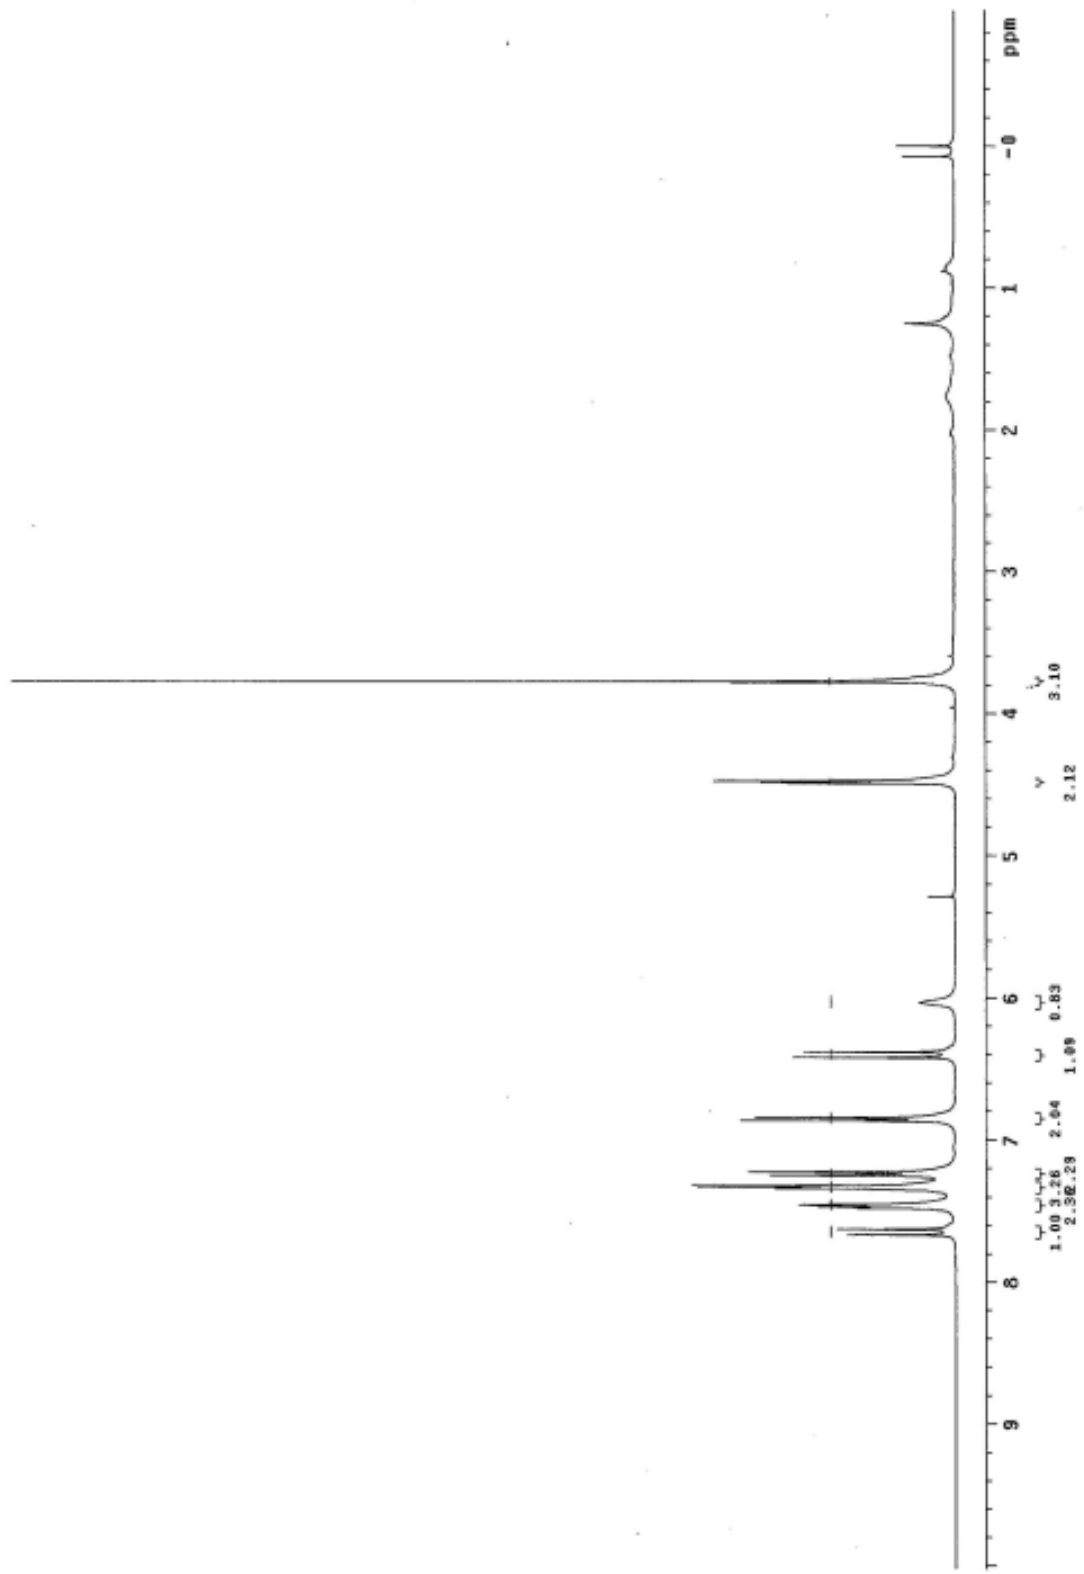

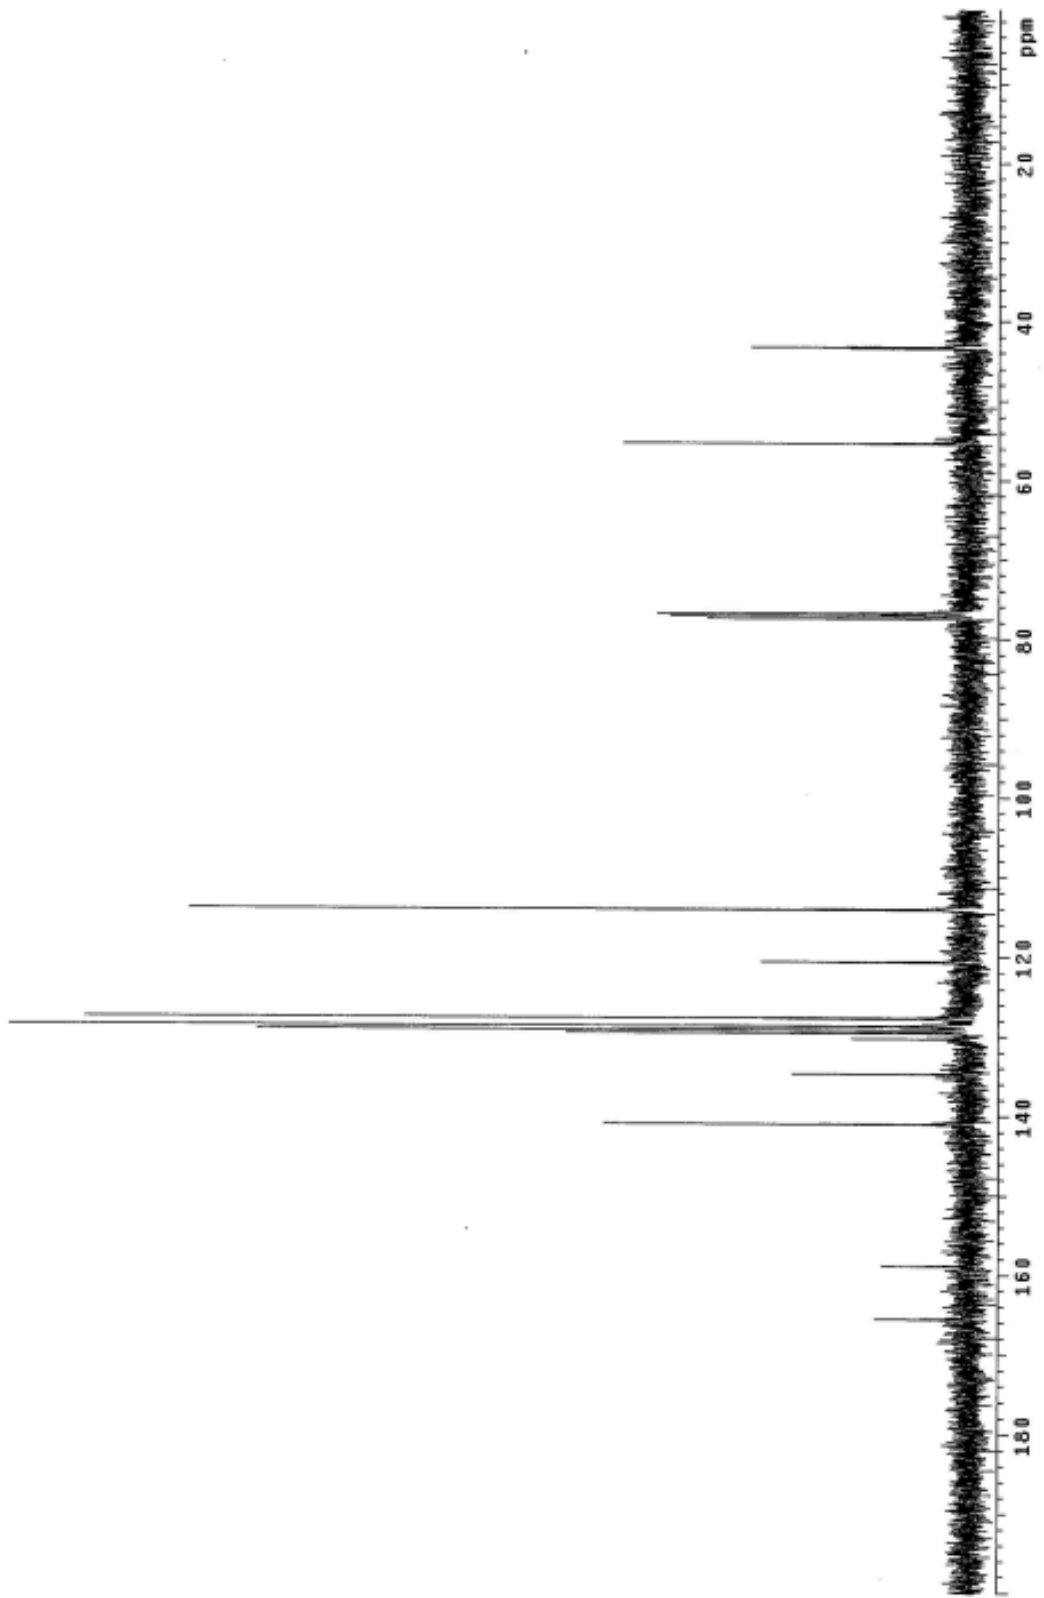

***N*-(furan-2-ylmethyl)cinnamamide (4b)**: The representative experimental procedure was applied to cinnamaldehyde **1a** (66.1 mg, 0.5 mmol) and furfurylamine (97.1 mg, 1.0 mmol) to yield **4b** (46.6 mg, 41 %).

**<sup>1</sup>H NMR** (400 MHz, CDCl<sub>3</sub>): δ 7.66 (d, 1H, *J* = 16.0 Hz), 7.49 (m, 2H), 7.36 (m, 4H), 6.40 (d, 1H, *J* = 16.0 Hz), 6.33 (m, 1H), 6.28 (m, 1H), 6.00 (s, 1H), 4.58 (d, 2H, *J* = 5.6 Hz) ppm

**<sup>13</sup>C NMR** (100 MHz, CDCl<sub>3</sub>): δ 165.6, 151.2, 142.2, 141.5, 134.7, 129.8, 128.8, 127.8, 120.3, 110.6, 107.7, 36.9 ppm

**IR** (neat, cm<sup>-1</sup>): 3271, 3063, 1657, 1620, 1449

**HRMS**: C<sub>14</sub>H<sub>13</sub>NO<sub>2</sub> Calcd : 227.0946, [M]<sup>+</sup> Found : 227.0944

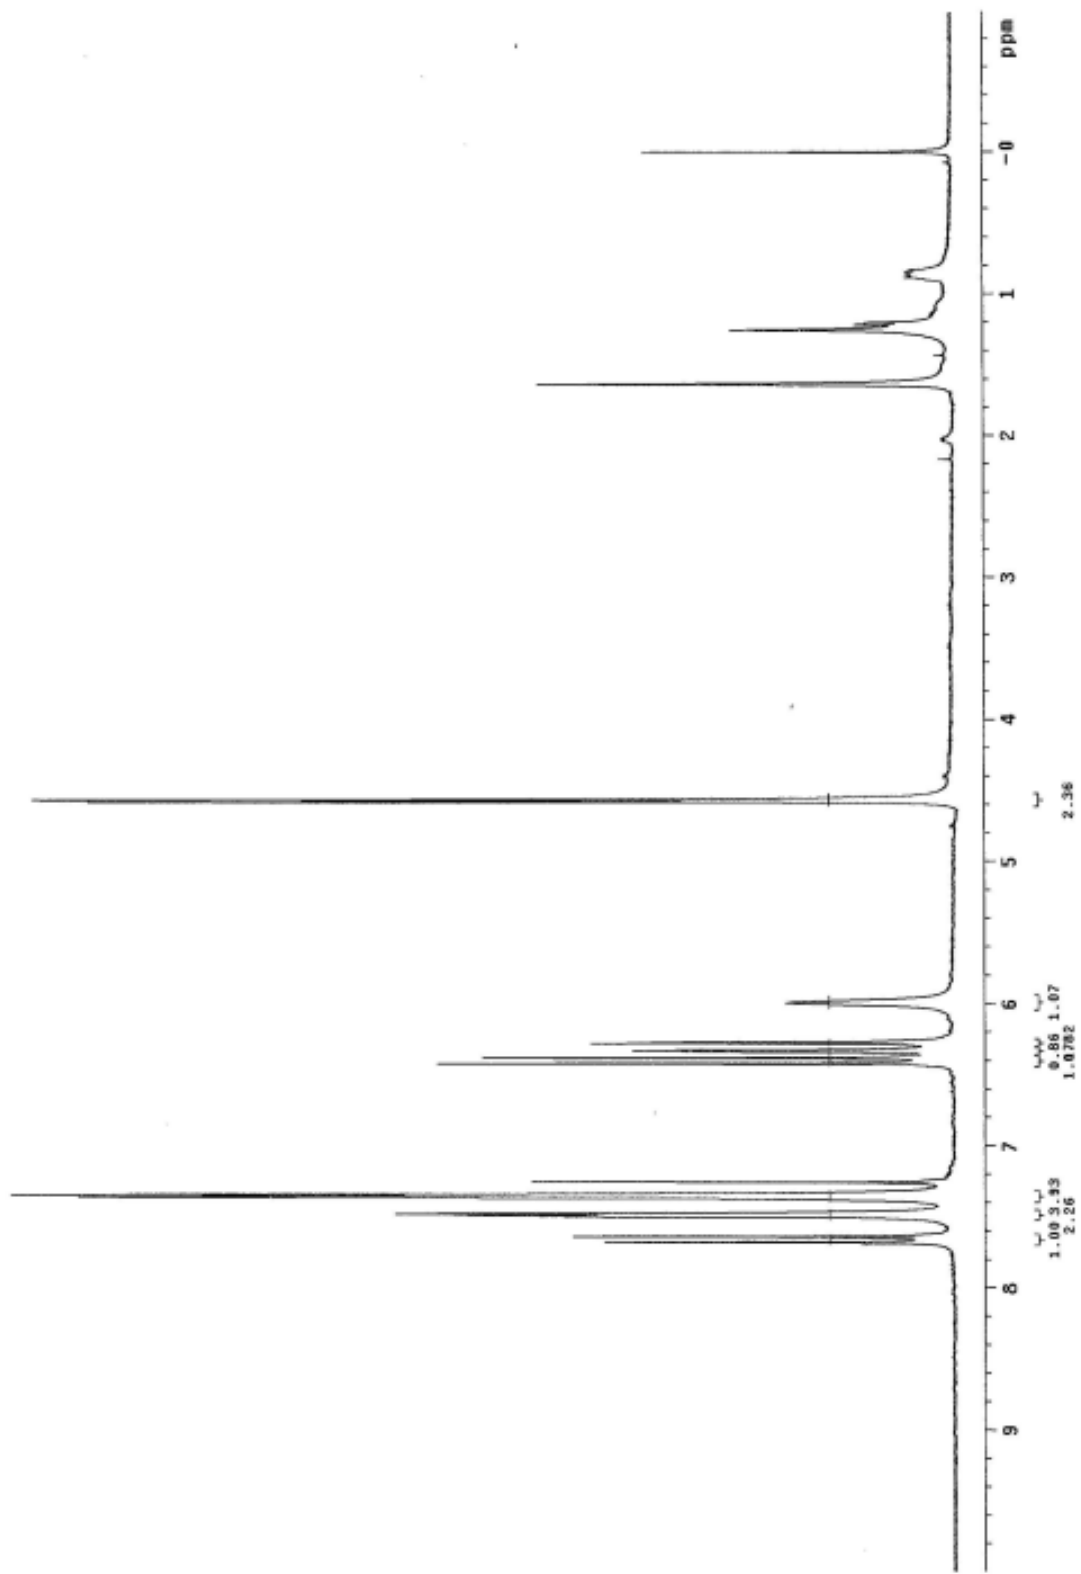

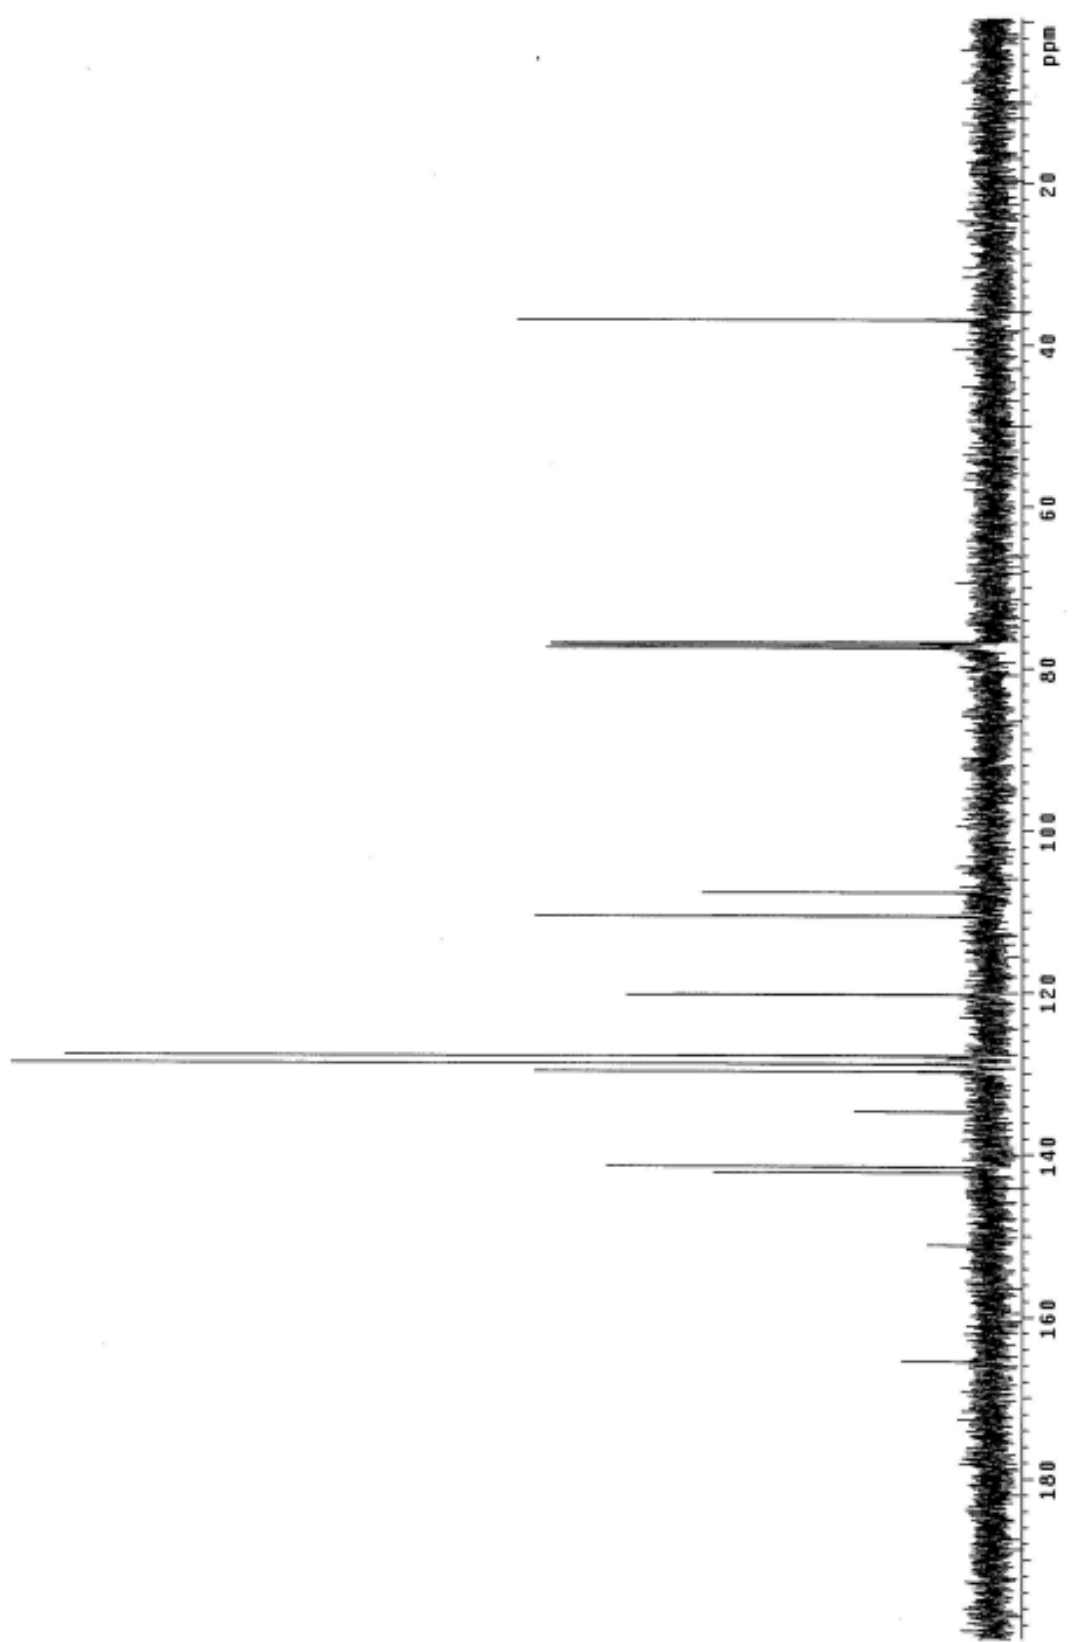

***N*-allylcinnamamide (5b):** The representative experimental procedure was applied to cinnamaldehyde **1a** (66.1 mg, 0.5 mmol) and allylamine (57.1 mg, 1.0 mmol) to yield **5b** (46.9 mg, 50 %).

**<sup>1</sup>H NMR** (400 MHz, CDCl<sub>3</sub>): δ 7.64 (d, 1H, *J* = 15.6 Hz), 7.47 (m, 2H), 7.33 (m, 3H), 6.53 (d, 2H, *J* = 15.6 Hz), 5.89 (m, 1H), 5.23 (dd, 1H, *J* = 16.0, 1.6 Hz), 5.14 (dd, 1H, *J* = 8.0, 1.6 Hz), 4.01 (t, 2H, *J* = 5.2 Hz) ppm

**<sup>13</sup>C NMR** (100 MHz, CDCl<sub>3</sub>): δ 165.9, 140.9, 134.7, 134.0, 129.5, 128.7, 127.7, 120.7, 116.4, 42.3 ppm

**IR** (neat, cm<sup>-1</sup>): 3285, 3084, 1658, 1618, 1450, 1223

**HRMS:** C<sub>12</sub>H<sub>13</sub>NO Calcd : 187.0997, [M]<sup>+</sup> Found : 187.0995

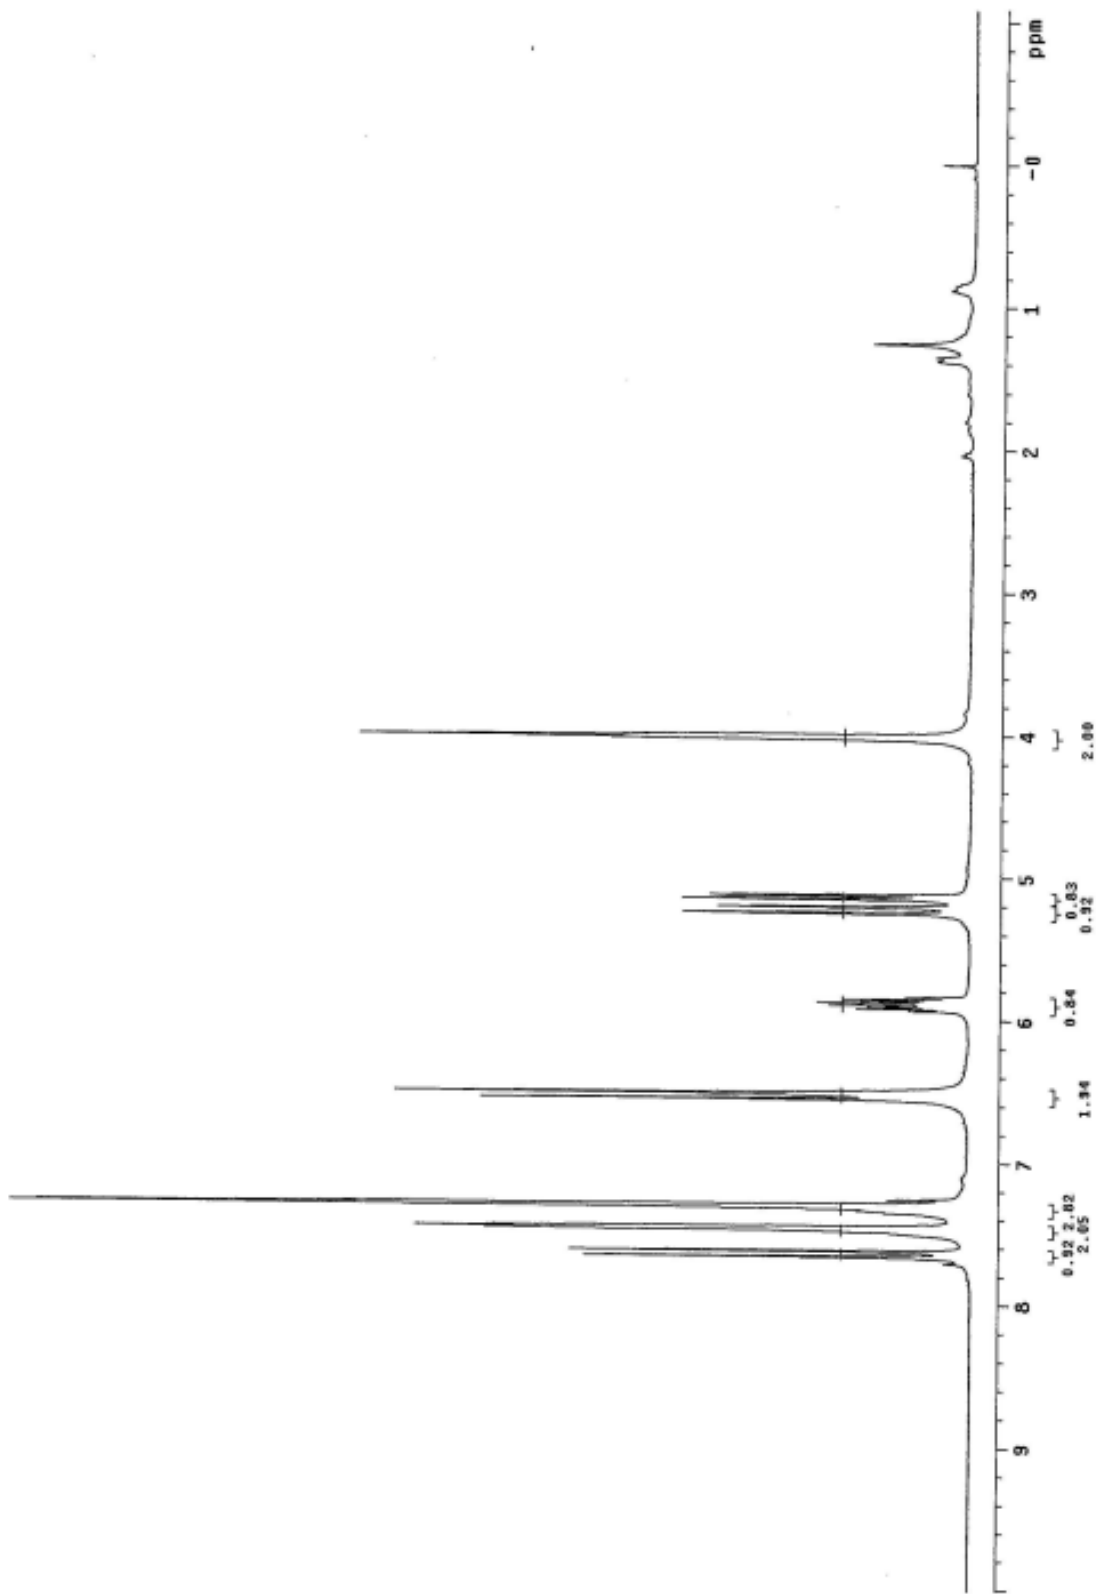

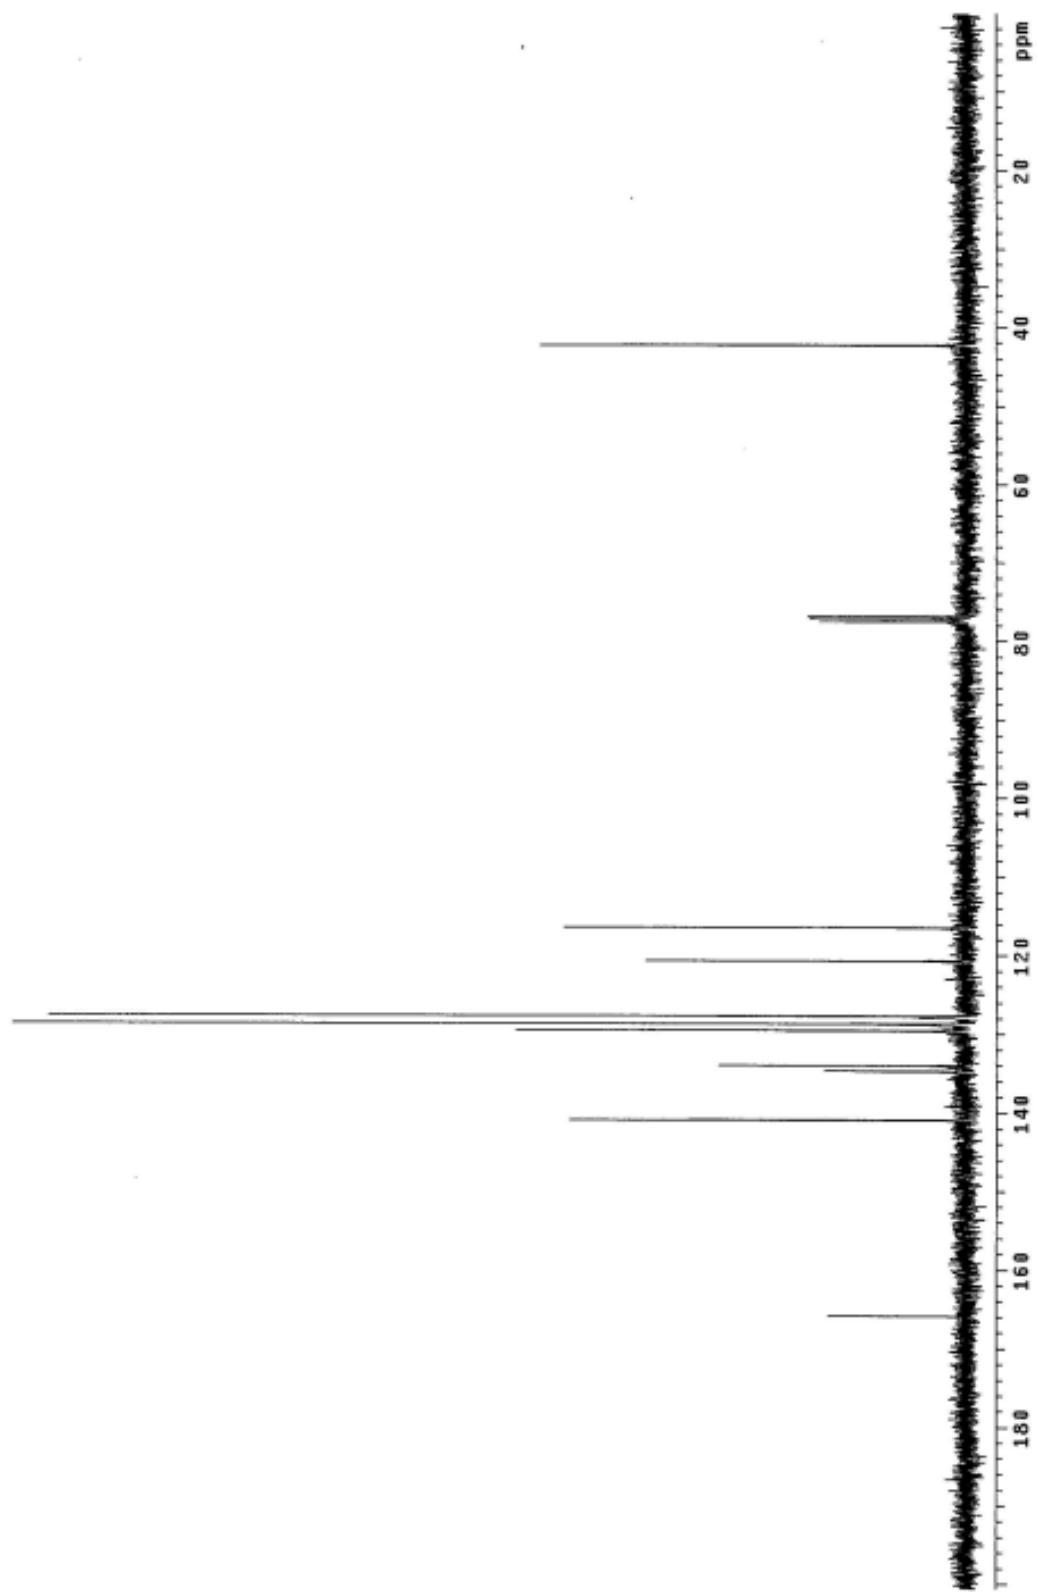



***N*-butylcinnamamide (6b):** The representative experimental procedure was applied to cinnamaldehyde **1a** (66.1 mg, 0.5 mmol) and *N*-butylamine (73.1 mg, 1.0 mmol) to yield **6b** (48.8 mg, 52 %).

**<sup>1</sup>H NMR** (400 MHz, CDCl<sub>3</sub>): δ 7.61 (d, 1H, *J* = 15.6 Hz), 7.47 (m, 2H), 7.32 (m, 3H), 6.43 (d, 1H, *J* = 16.0 Hz), 6.00 (s, 1H), 3.38 (m, 2H), 1.55 (m, 2H), 1.38 (m, 2H), 0.93 (t, 3H, *J* = 7.6 Hz) ppm

**<sup>13</sup>C NMR** (100 MHz, CDCl<sub>3</sub>): δ 166.0, 140.5, 134.8, 129.4, 128.6, 127.6, 121.0, 39.7, 31.8, 20.3, 13.9 ppm

**IR** (neat, cm<sup>-1</sup>): 3290, 2961, 1659, 1621, 1450, 1265

**HRMS:** C<sub>13</sub>H<sub>17</sub>NO Calcd : 203.1310, [M]<sup>+</sup> Found : 203.1308

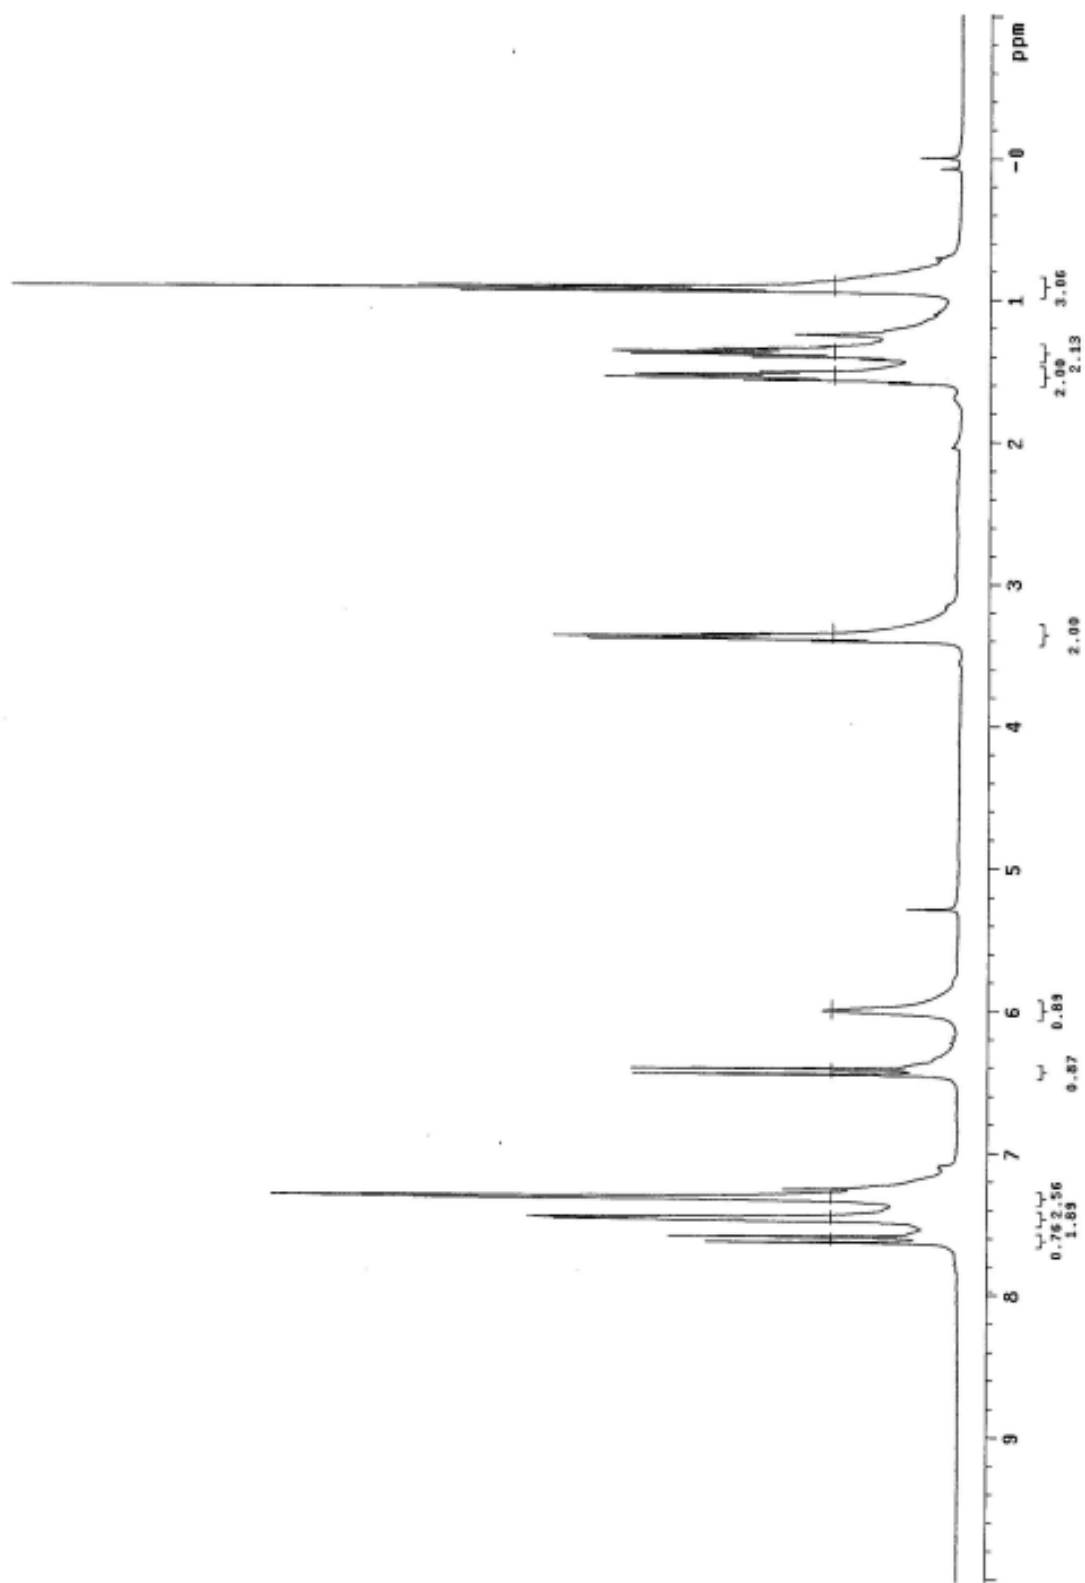

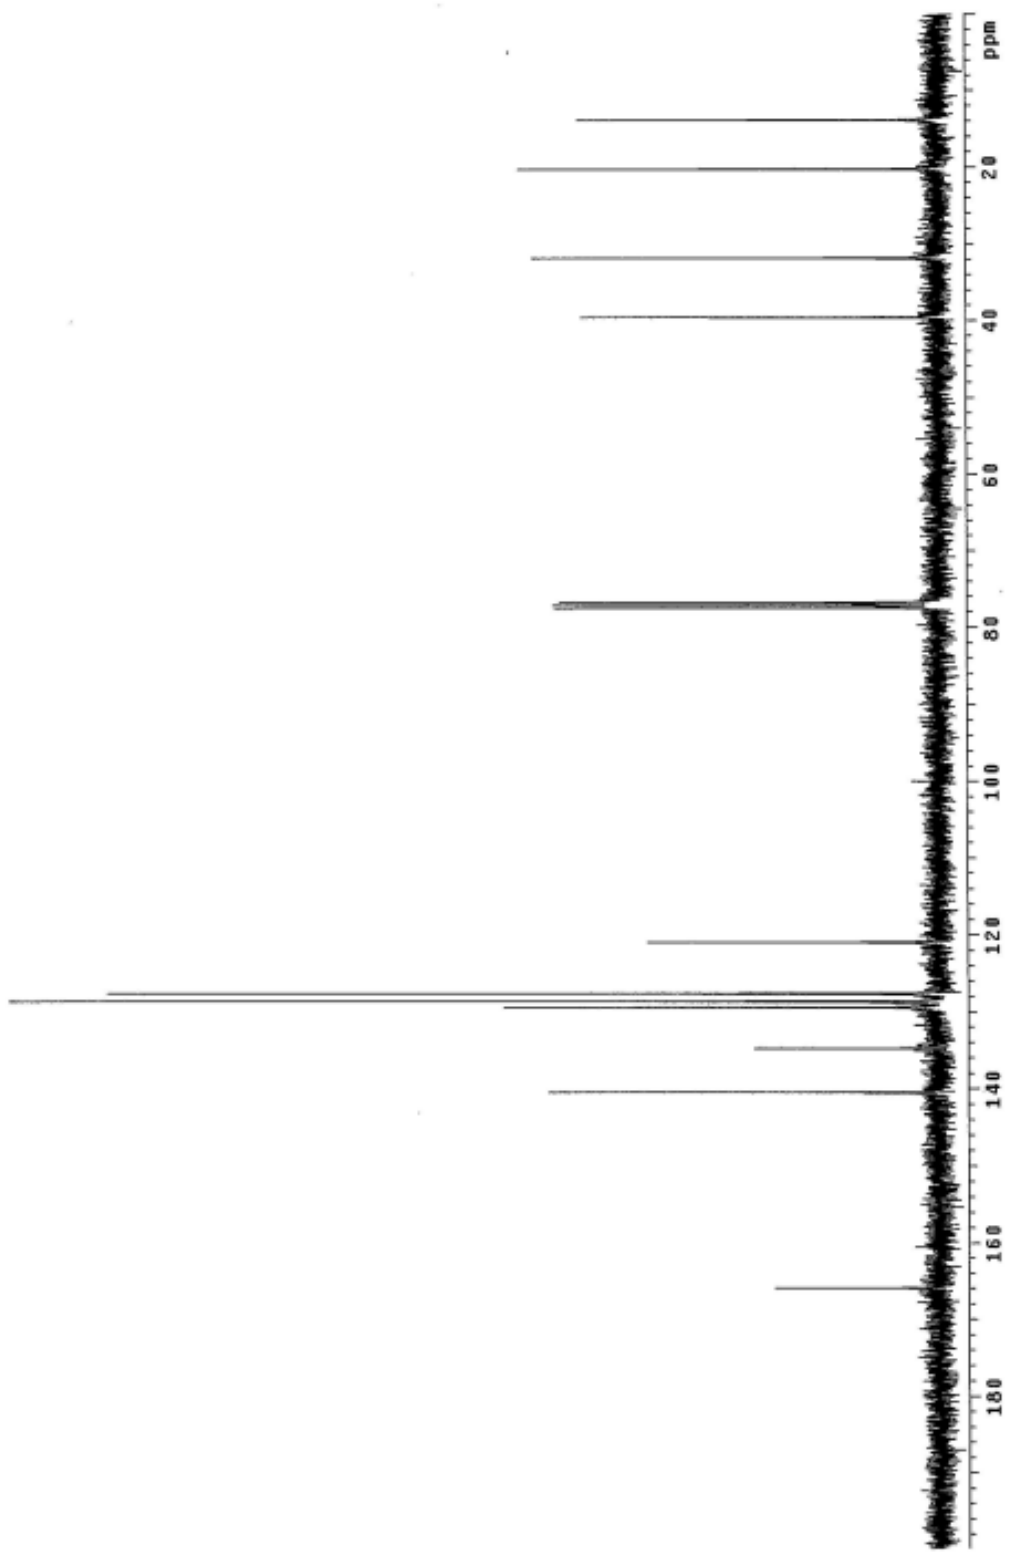

***N*-(1-phenylpropyl)cinnamamide (7b)**: The representative experimental procedure was applied to cinnamaldehyde **1a** (66.1 mg, 0.5 mmol) and (*S*)-(-)- $\alpha$ -ethylbenzylamine (135.2 mg, 1.0 mmol) to yield **7b** (80.0 mg, 60 %).

**<sup>1</sup>H NMR** (400 MHz, CDCl<sub>3</sub>):  $\delta$  7.61 (d, 1H, *J* = 16.0 Hz), 7.45 (dd, 2H, *J* = 8.0, 3.6 Hz), 7.27 (m, 8H), 6.44 (d, 1H, *J* = 16.0 Hz), 6.15 (d, 1H, *J* = 8.0 Hz), 5.03 (m, 1H), 1.89 (m, 2H), 0.92 (t, 3H, *J* = 7.2 Hz) ppm

**<sup>13</sup>C NMR** (100 MHz, CDCl<sub>3</sub>):  $\delta$  165.2, 142.0, 140.9, 134.7, 129.4, 128.6, 128.4, 127.6, 127.1, 126.6, 120.9, 55.2, 29.3, 11.0 ppm

**IR** (neat, cm<sup>-1</sup>): 3276, 3063, 2967, 1619, 1450, 1219

**HRMS**: C<sub>18</sub>H<sub>19</sub>NO Calcd : 265.1467, [M]<sup>+</sup> Found : 265.1465

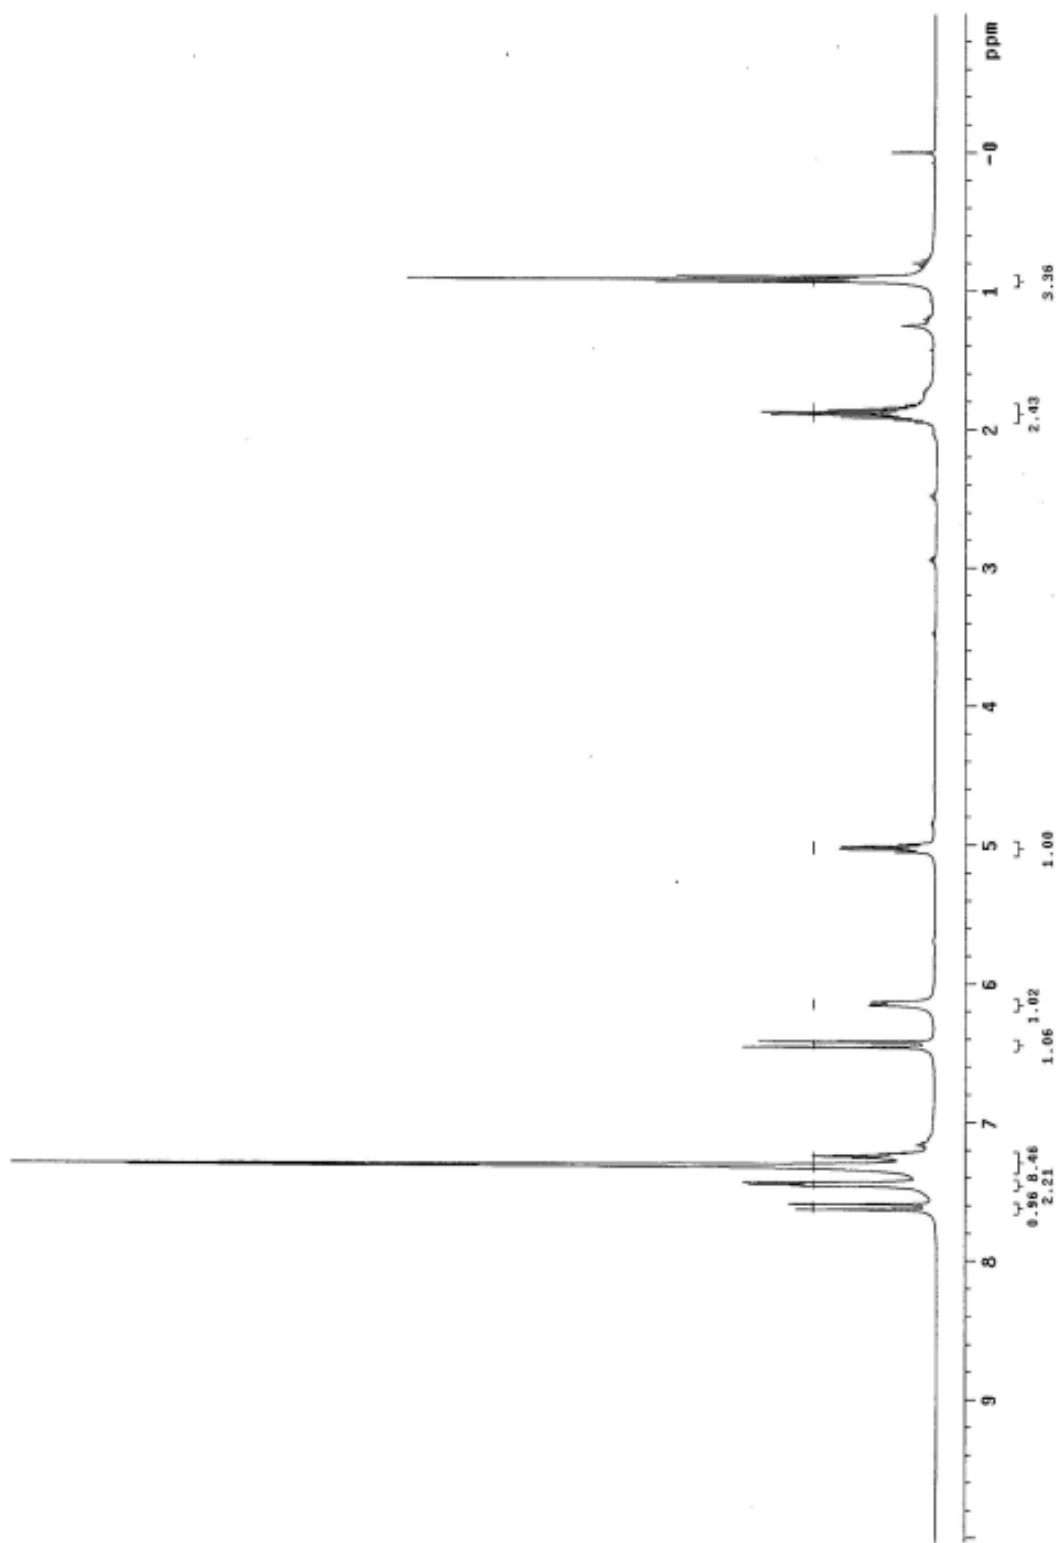

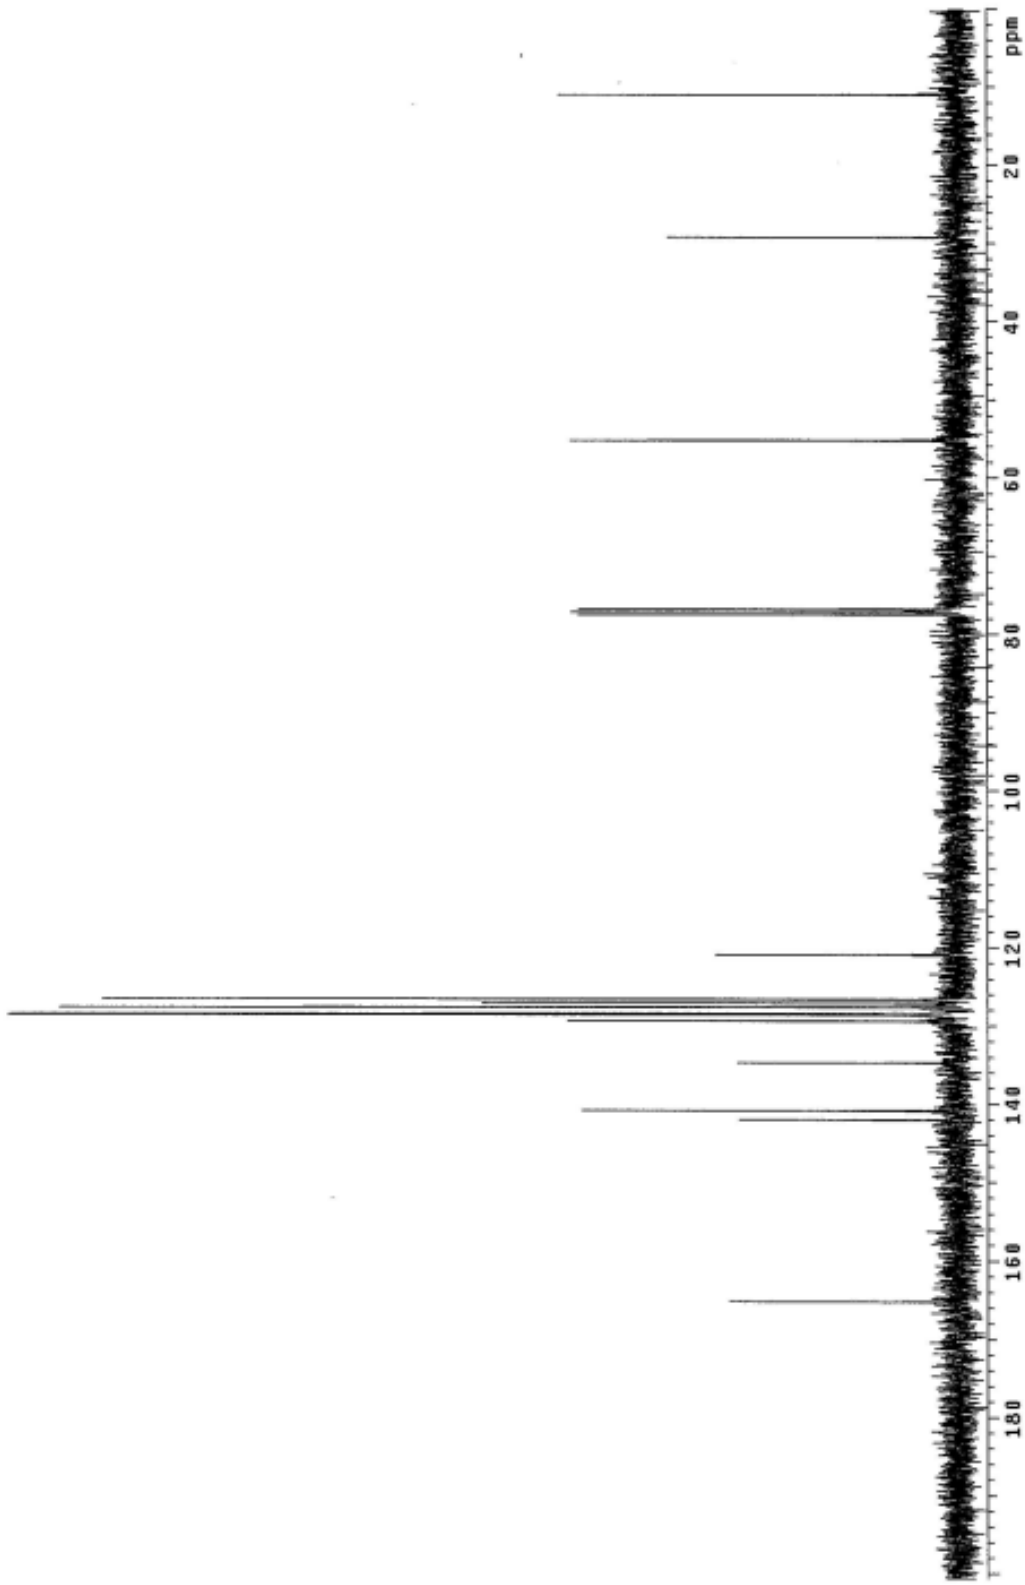

**N-benzylbenzamide (8b):** The representative experimental procedure was applied to benzaldehyde (53.1 mg, 0.5 mmol) and benzylamine (109.2 mg, 1.0 mmol) to yield **8b** (58.4 mg, 55 %)

**<sup>1</sup>H NMR** (400 MHz, CDCl<sub>3</sub>):  $\delta$  7.78 (d, 2H,  $J = 7.6$  Hz), 7.47 (t, 1H,  $J = 6.8$  Hz), 7.38 (t, 2H,  $J = 7.6$  Hz), 7.28 (m, 5H), 6.86 (s, 1H), 4.59 (d, 2H,  $J = 5.2$  Hz) ppm

**<sup>13</sup>C NMR** (100 MHz, CDCl<sub>3</sub>):  $\delta$  167.3, 138.1, 134.2, 131.3, 128.6, 128.4, 127.7, 127.3, 126.9, 44.1 ppm

**IR** (neat, cm<sup>-1</sup>): 3327, 3066, 1644, 1538, 1489

**HRMS:** C<sub>14</sub>H<sub>13</sub>NO Calcd : 211.0997, [M]<sup>+</sup> Found : 211.0994

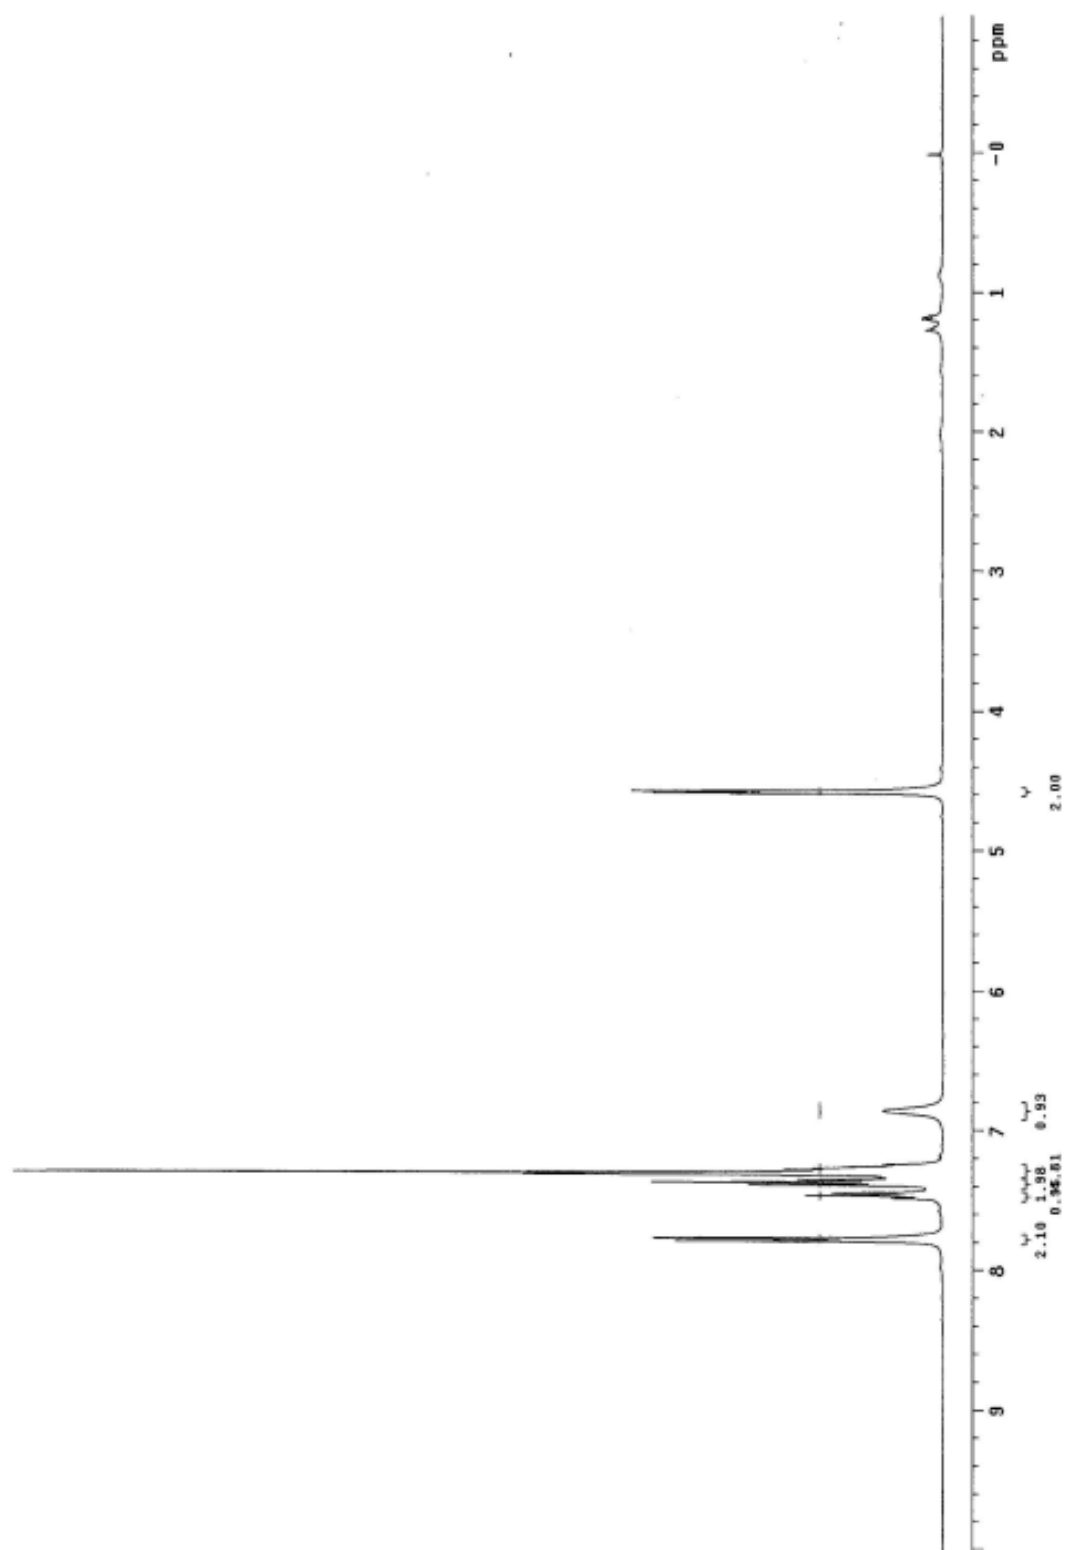



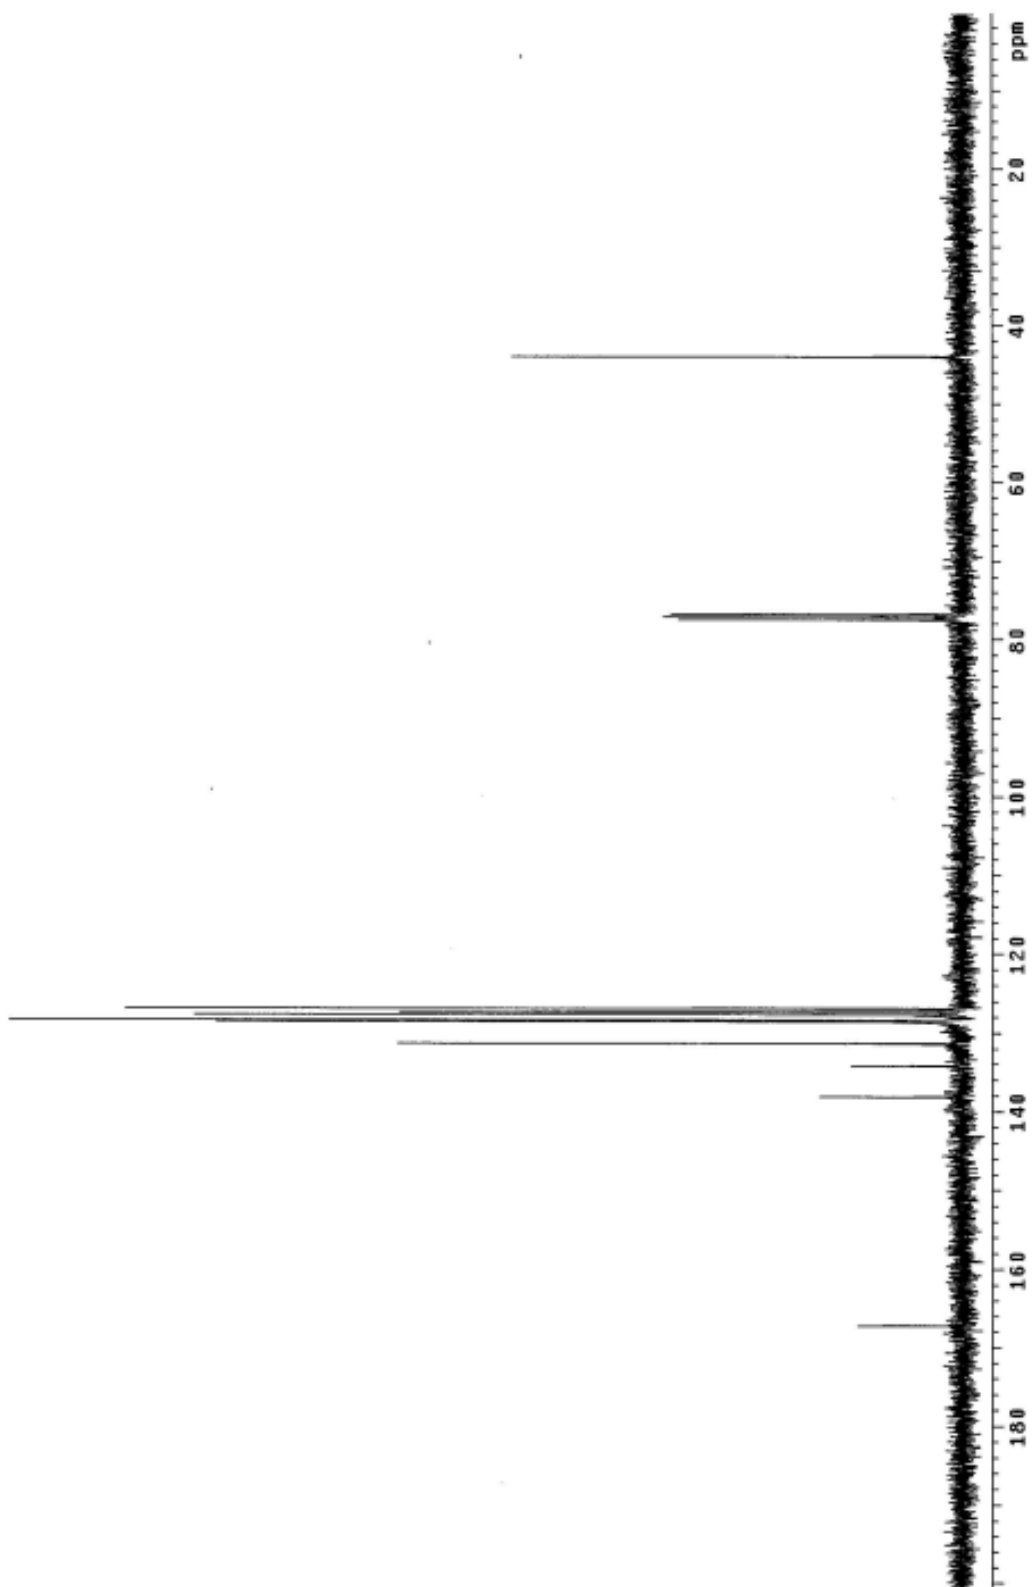

**N-benzyl-4-nitrobenzamide (9b):** The representative experimental procedure was applied to 4-nitrobenzaldehyde (75.6 mg, 0.5 mmol) and benzylamine (109.2 mg, 1.0 mmol) to yield **9b** (71.0 mg, 55 %)

**<sup>1</sup>H NMR** (400 MHz, CDCl<sub>3</sub>): δ 8.24 (d, 2H, *J* = 8.0 Hz), 7.93 (d, 2H, *J* = 8.4 Hz), 7.34 (m, 5H), 6.71 (s, 1H), 4.64 (d, 2H, *J* = 4.8 Hz) ppm

**<sup>13</sup>C NMR** (100 MHz, CDCl<sub>3</sub>): δ 165.3, 149.5, 139.9, 137.4, 128.9, 128.2, 127.9, 123.8, 44.6 ppm

**IR** (neat, cm<sup>-1</sup>): 3279, 3053, 1665, 1601, 1486, 1265

**HRMS:** C<sub>14</sub>H<sub>12</sub>N<sub>2</sub>O<sub>3</sub> Calcd : 256.0848, [M]<sup>+</sup> Found : 256.0848

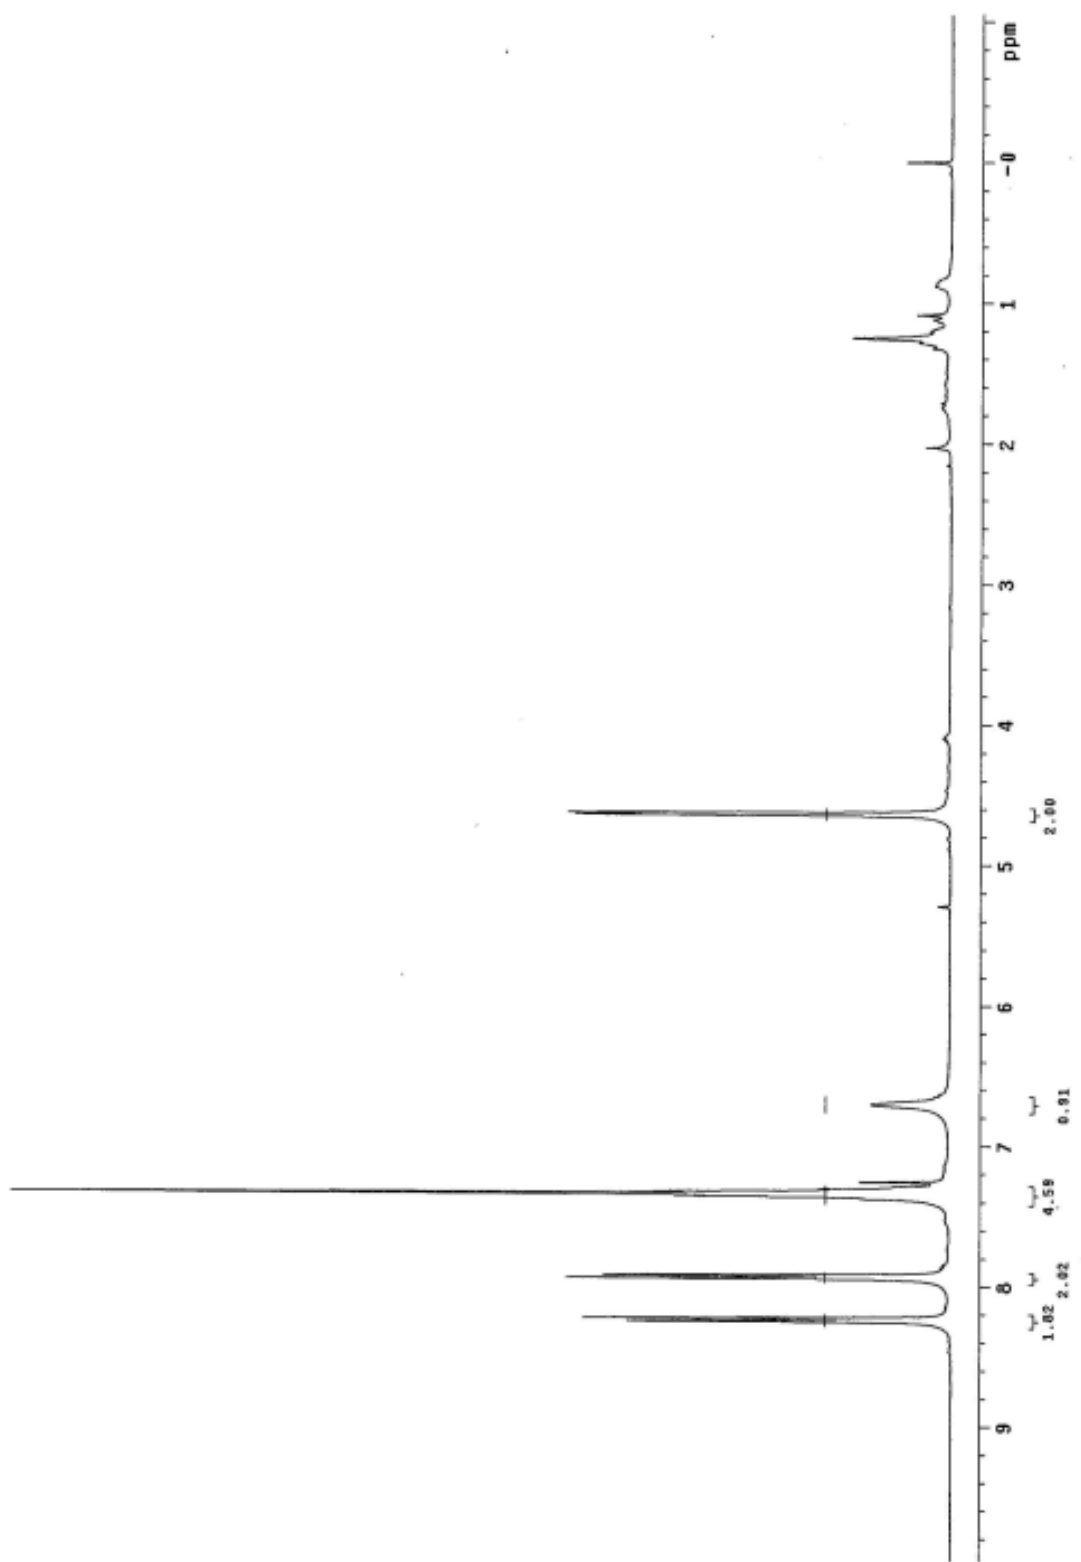

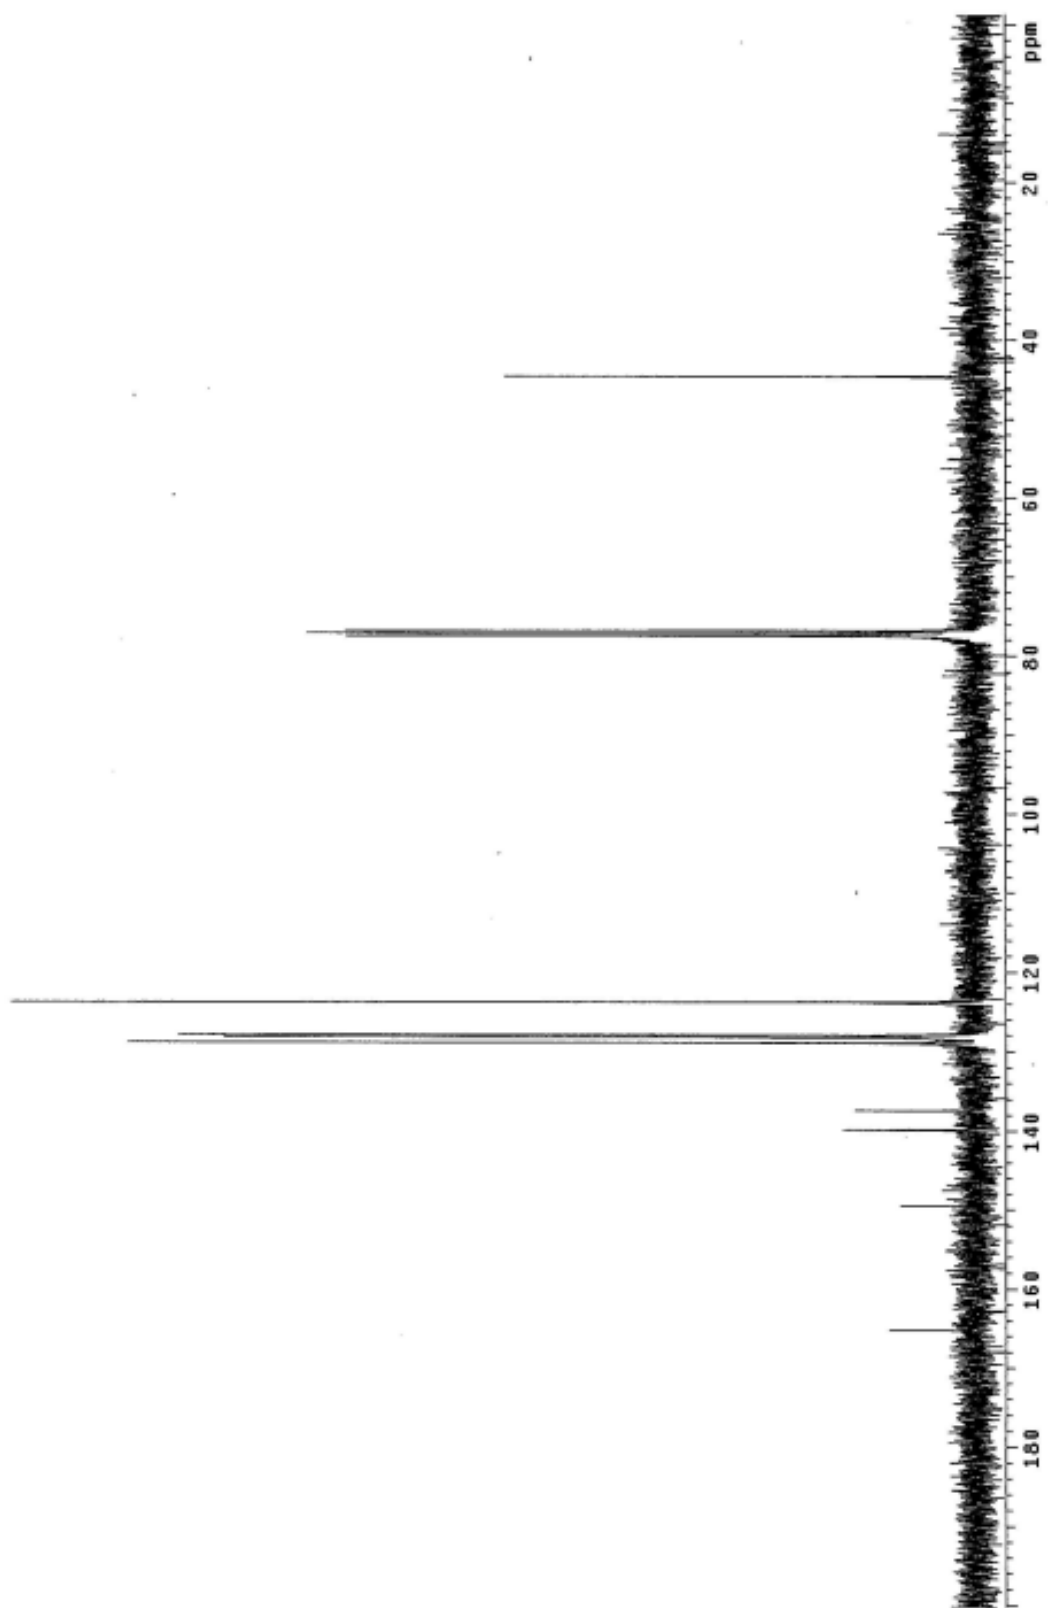

***N*-benzyl-4-fluorobenzamide (10b)**: The representative experimental procedure was applied to 4-fluorobenzaldehyde (62.1 mg, 0.5 mmol) and benzylamine (109.2 mg, 1.0 mmol) to yield **10b** (64.2 mg, 56 %)

**<sup>1</sup>H NMR** (400 MHz, CDCl<sub>3</sub>): δ 7.79 (dd, 2H, *J* = 8.0, 5.2 Hz), 7.32 (m, 5H), 7.08 (m, 2H), 6.59 (s, 1H), 4.60 (d, 2H, *J* = 5.6 Hz) ppm

**<sup>13</sup>C NMR** (100 MHz, CDCl<sub>3</sub>): δ 166.3, 165.9, 163.4, 138.0, 129.4, 129.3, 128.8, 127.9, 127.6, 115.7, 115.5, 44.4 ppm

**IR** (neat, cm<sup>-1</sup>): 3322, 3054, 1649, 1498, 1265

**HRMS**: C<sub>14</sub>H<sub>12</sub>FNO Calcd : 229.0903, [M]<sup>+</sup> Found : 229.0904

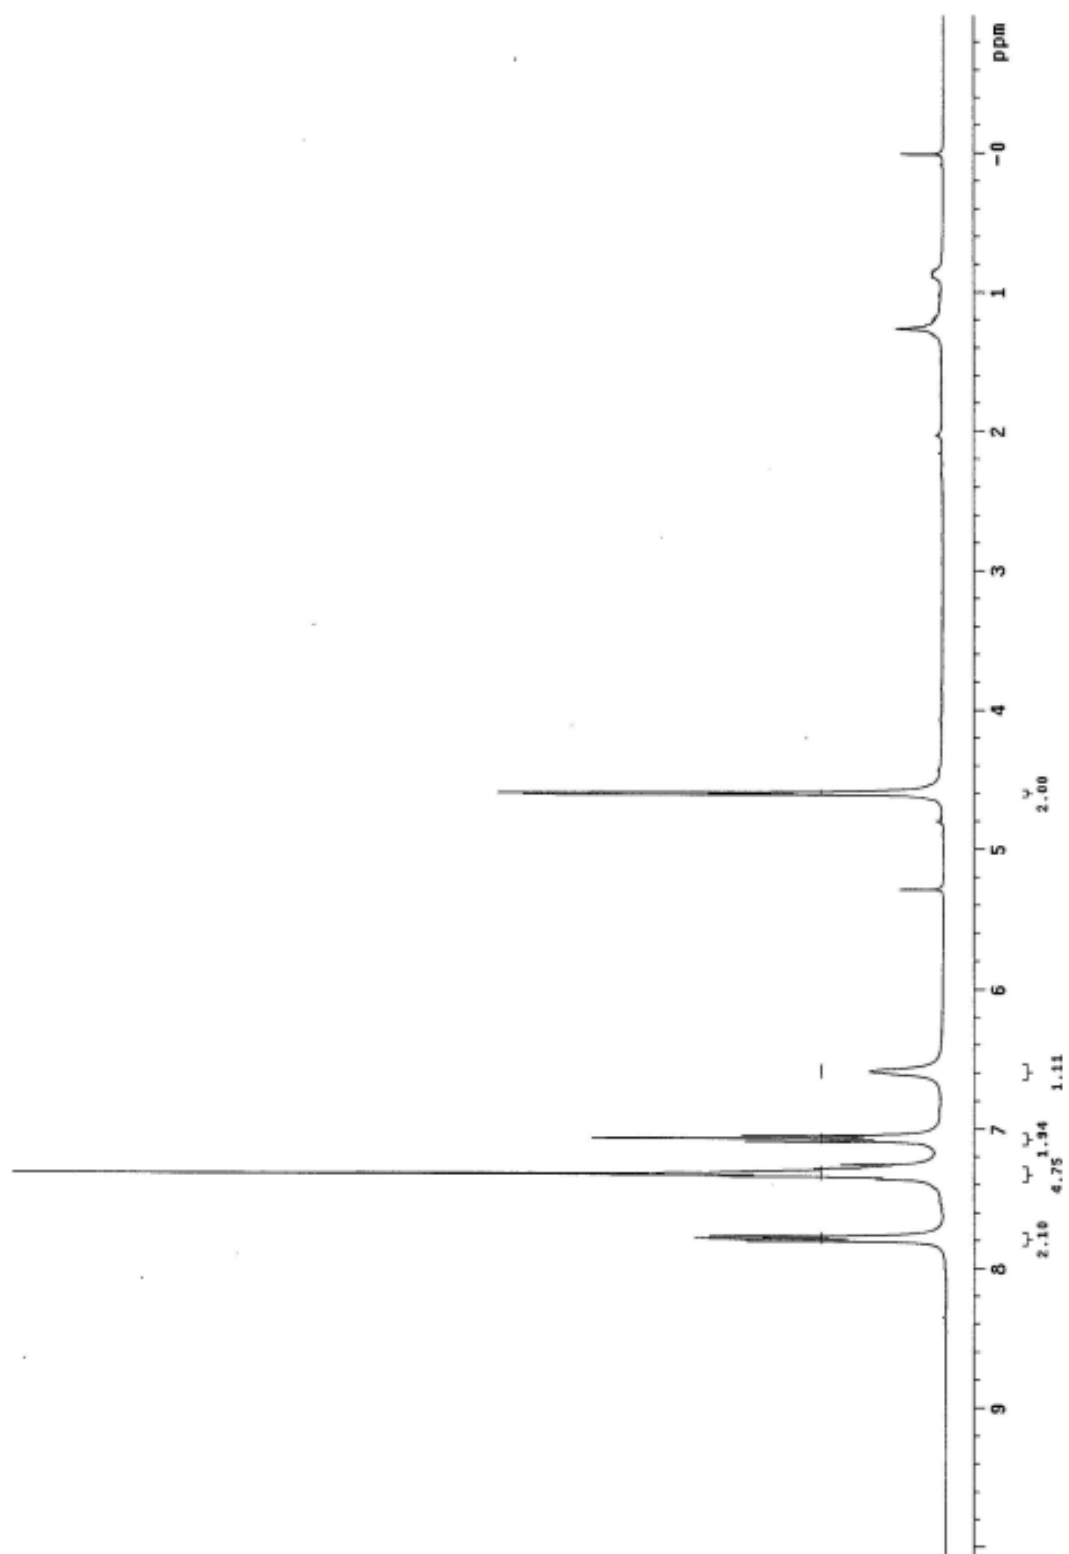

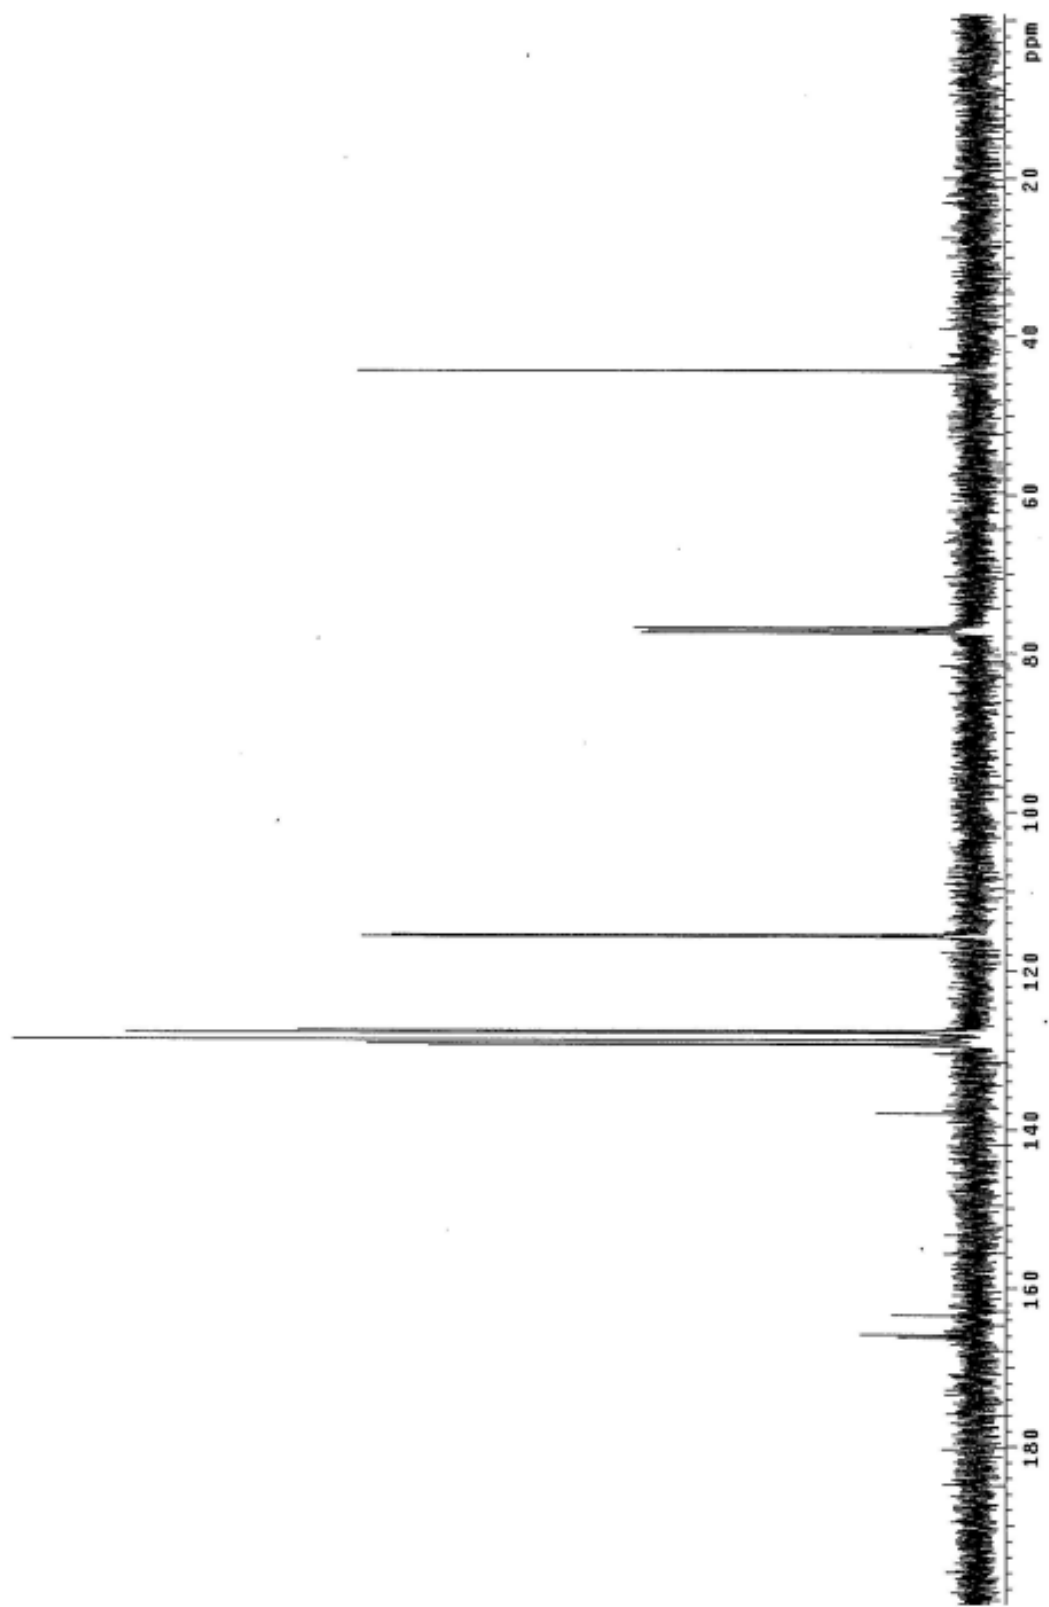

***N*-benzylthiophene-2-carboxamide (11b):** The representative experimental procedure was applied to 2-thiophenecarboxaldehyde (56.1 mg, 0.5 mmol) and benzylamine (109.2 mg, 1.0 mmol) to yield **11b** (58.7 mg, 54 %)

**<sup>1</sup>H NMR** (400 MHz, CDCl<sub>3</sub>): δ 7.52 (d, 1H, *J* = 3.2 Hz), 7.44 (d, 1H, *J* = 4.8 Hz), 7.27 (m, 5H), 7.02 (t, 1H, *J* = 4.0 Hz), 6.65 (s, 1H), 4.56 (d, 2H, *J* = 5.2 Hz) ppm

**<sup>13</sup>C NMR** (100 MHz, CDCl<sub>3</sub>): δ 161.8, 138.8, 138.1, 130.0, 128.7, 128.2, 127.9, 127.6 (2C), 44.1 ppm

**IR** (neat, cm<sup>-1</sup>): 3347, 3088, 1621, 1545, 1422

**HRMS:** C<sub>12</sub>H<sub>11</sub>NOS Calcd : 217.0561, [M]<sup>+</sup> Found : 217.0564



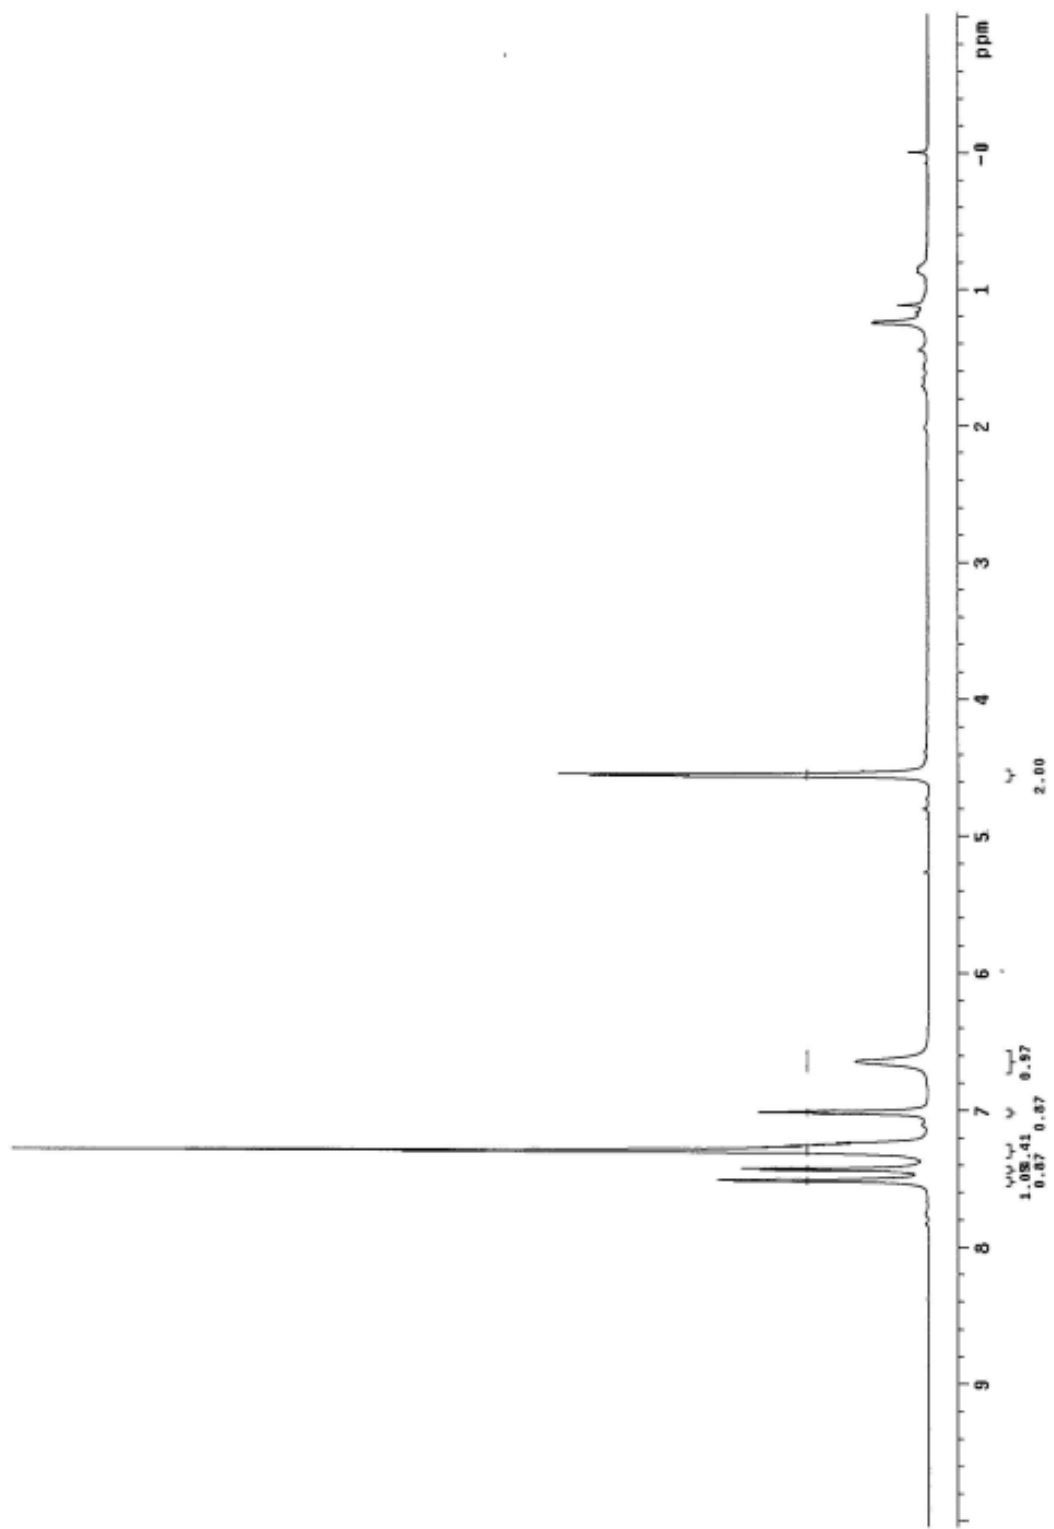

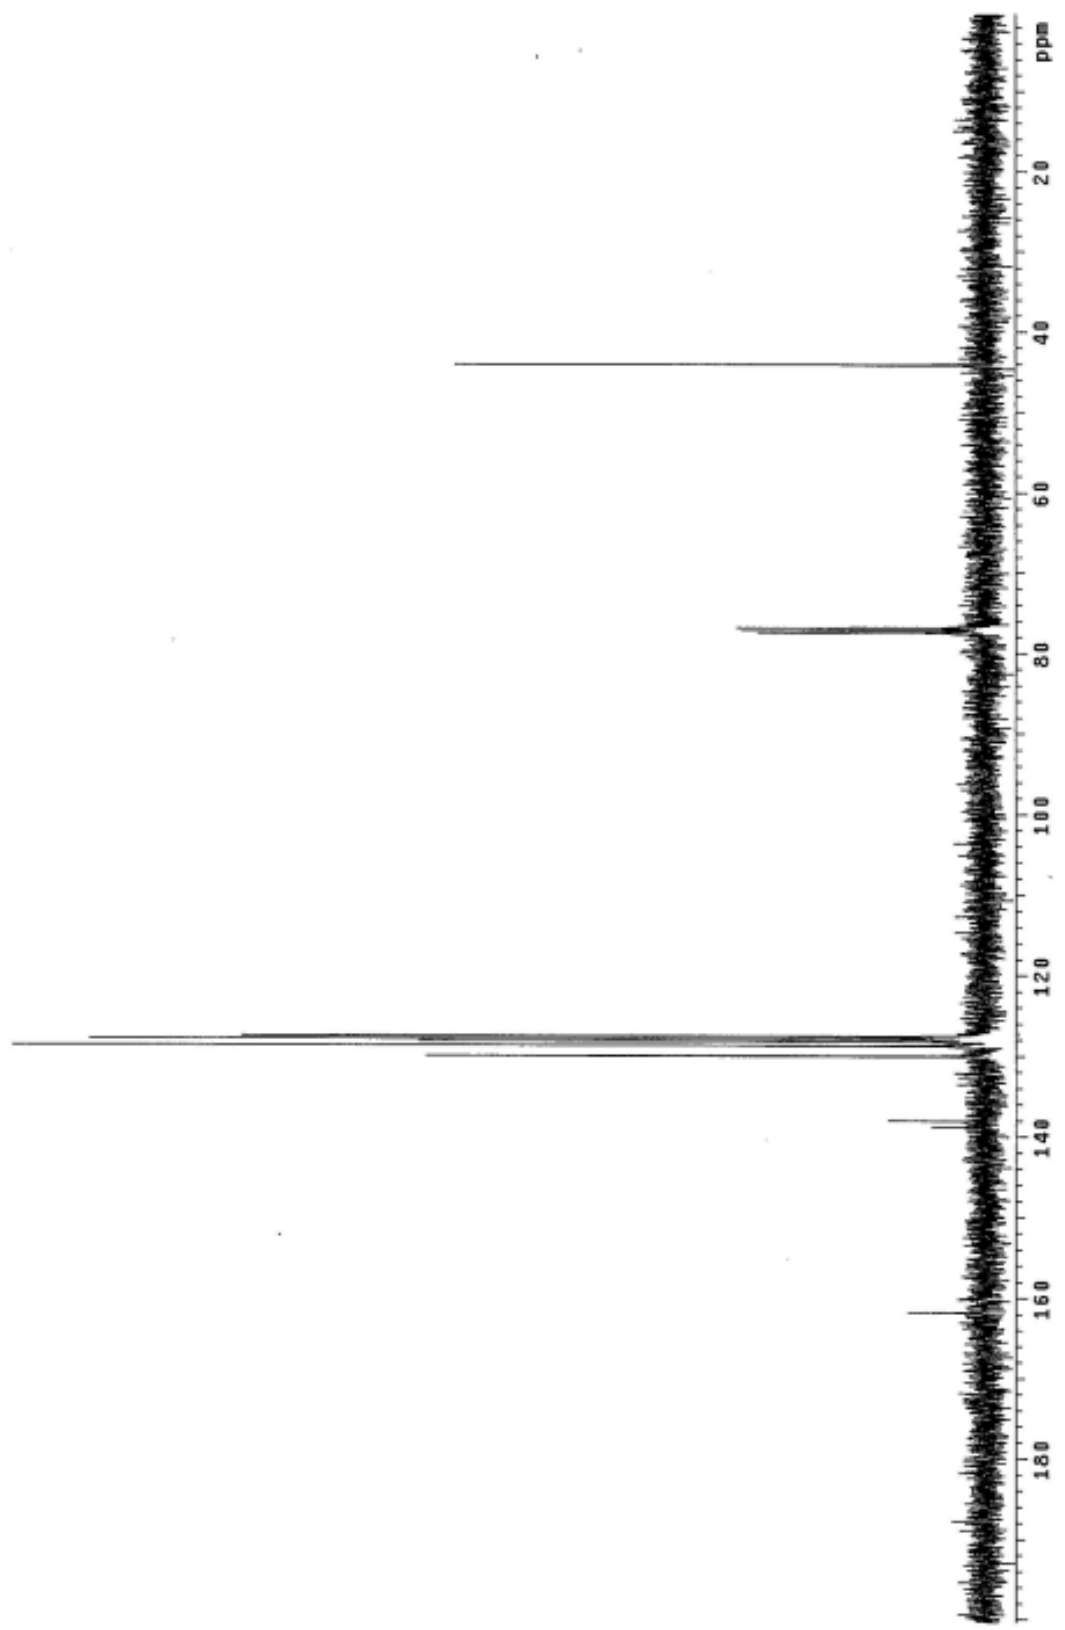

***N*-benzylfuran-2-carboxamide (12b)**: The representative experimental procedure was applied to furfural (48.0 mg, 0.5 mmol) and benzylamine (109.2 mg, 1.0 mmol) to yield **12b** (71.9 mg, 72 %)

**<sup>1</sup>H NMR** (400 MHz, CDCl<sub>3</sub>): δ 7.38 (s, 1H), 7.31 (m, 4H), 7.27 (m, 1H), 7.12 (d, 1H, *J* = 3.6 Hz), 6.70 (s, 1H), 6.47 (m, 1H), 4.58 (d, 2H, *J* = 6.0 Hz) ppm

**<sup>13</sup>C NMR** (100 MHz, CDCl<sub>3</sub>): δ 158.0, 147.6, 143.7, 137.8, 128.5, 127.7, 127.4, 114.2, 112.0, 43.1 ppm

**IR** (neat, cm<sup>-1</sup>): 3288, 3125, 3064, 1659, 1476

**HRMS**: C<sub>12</sub>H<sub>11</sub>NO<sub>2</sub> Calcd : 201.0790, [M]<sup>+</sup> Found : 201.0790

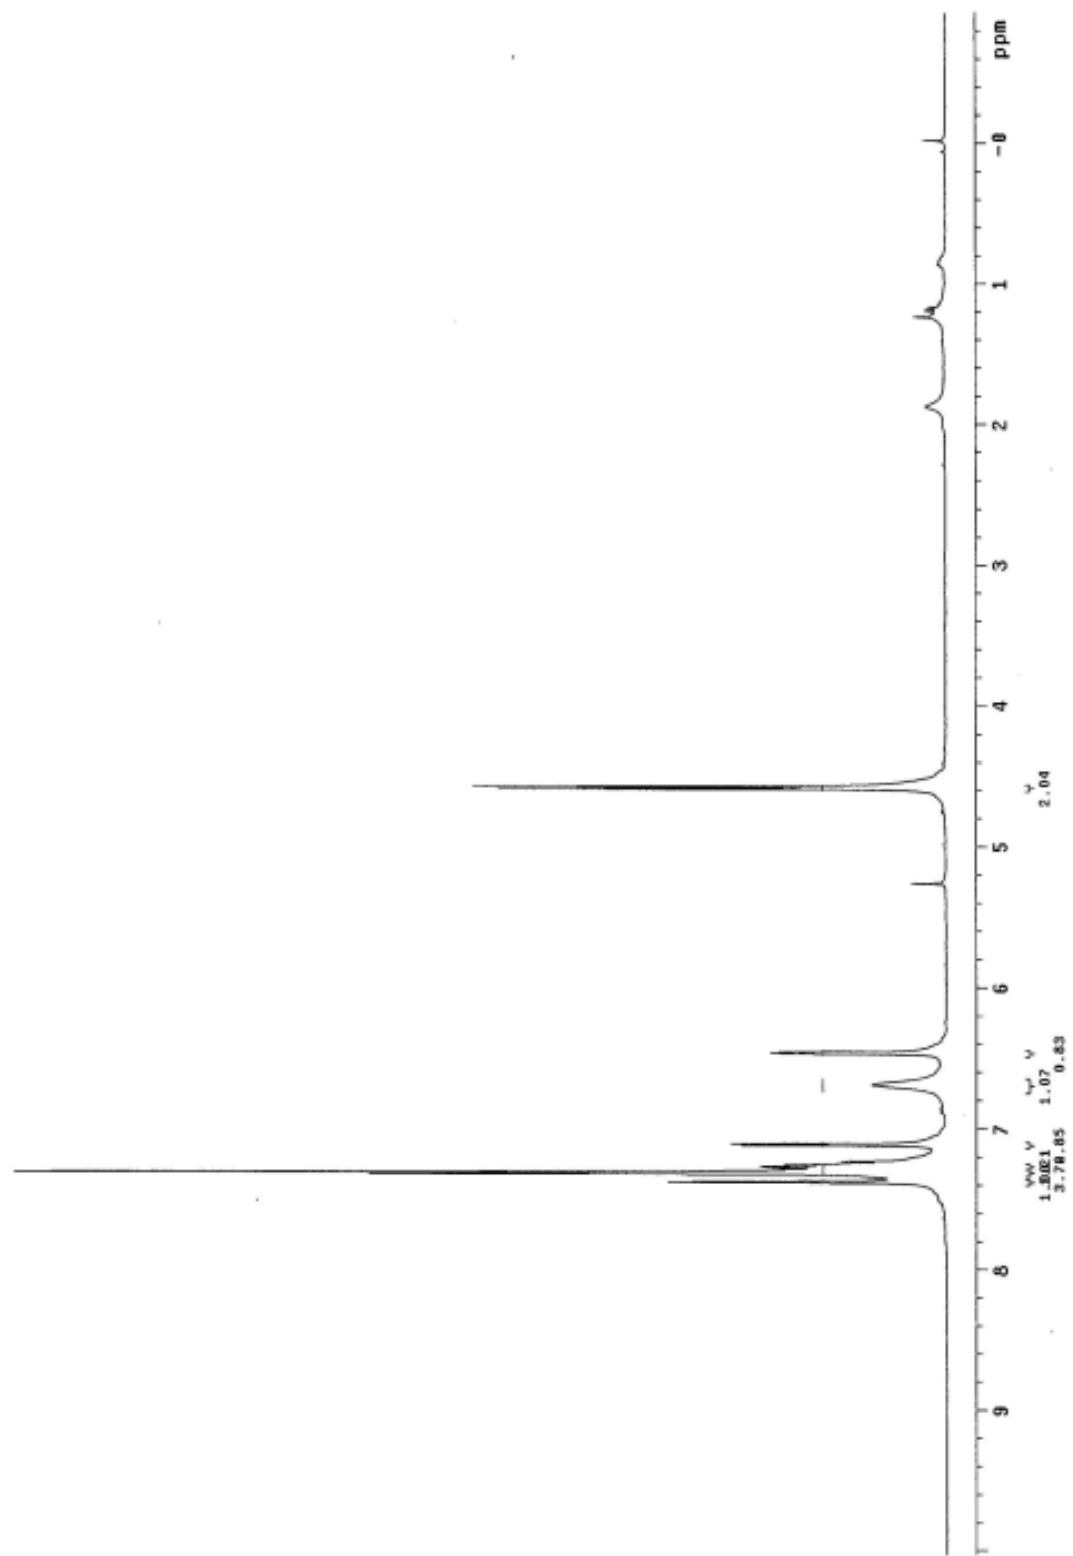

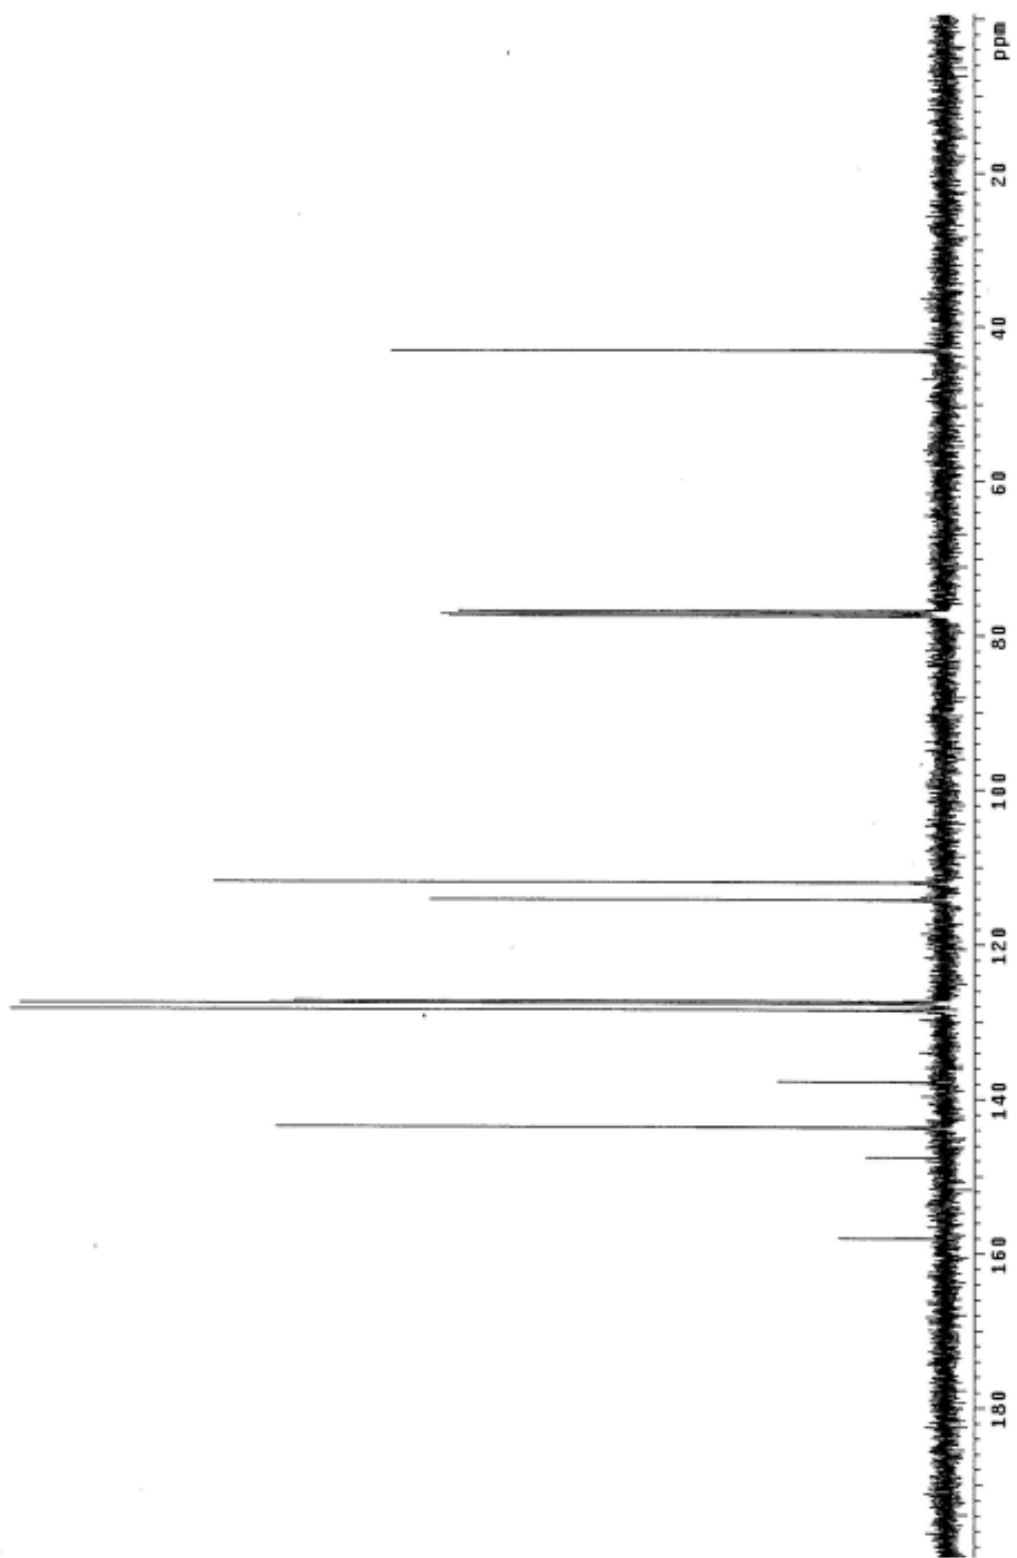

***N*-benzyl-3-phenylpropanamide (13b)**: The representative experimental procedure was applied hydrocinnamaldehyde (67.1 mg, 0.5 mmol) and benzylamine (109.2 mg, 1.0 mmol) to yield **13b** (53.7 mg, 45 %)

**<sup>1</sup>H NMR** (400 MHz, CDCl<sub>3</sub>): δ 7.17 (m, 10H), 6.03 (s, 1H), 4.33 (d, 2H, *J* = 5.2 Hz), 2.94 (t, 2H, *J* = 7.2 Hz), 2.47 (t, 2H, *J* = 7.6 Hz) ppm

**<sup>13</sup>C NMR** (100 MHz, CDCl<sub>3</sub>): δ 171.8, 140.7, 138.1, 128.5, 128.4, 128.3, 127.6, 127.3, 126.1, 43.6, 38.5, 31.9 ppm

**IR** (neat, cm<sup>-1</sup>): 3285, 3030, 2929, 1639, 1454

**HRMS**: C<sub>16</sub>H<sub>17</sub>NO Calcd : 239.1310, [M]<sup>+</sup> Found : 239.1309

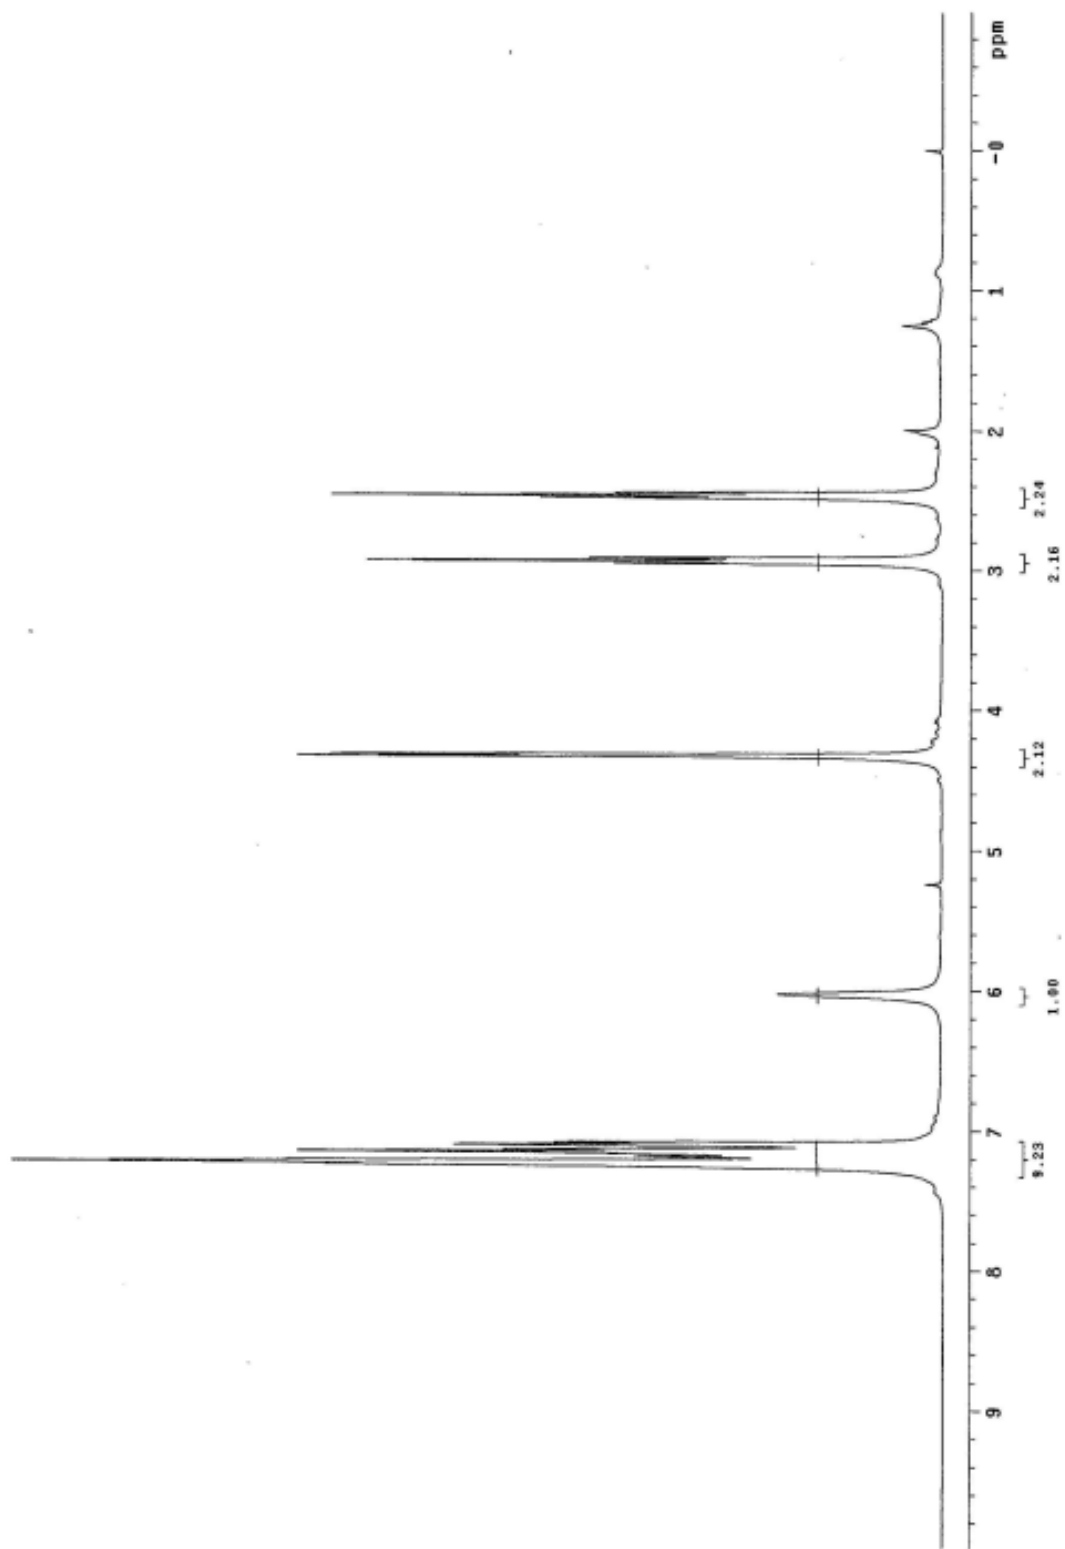

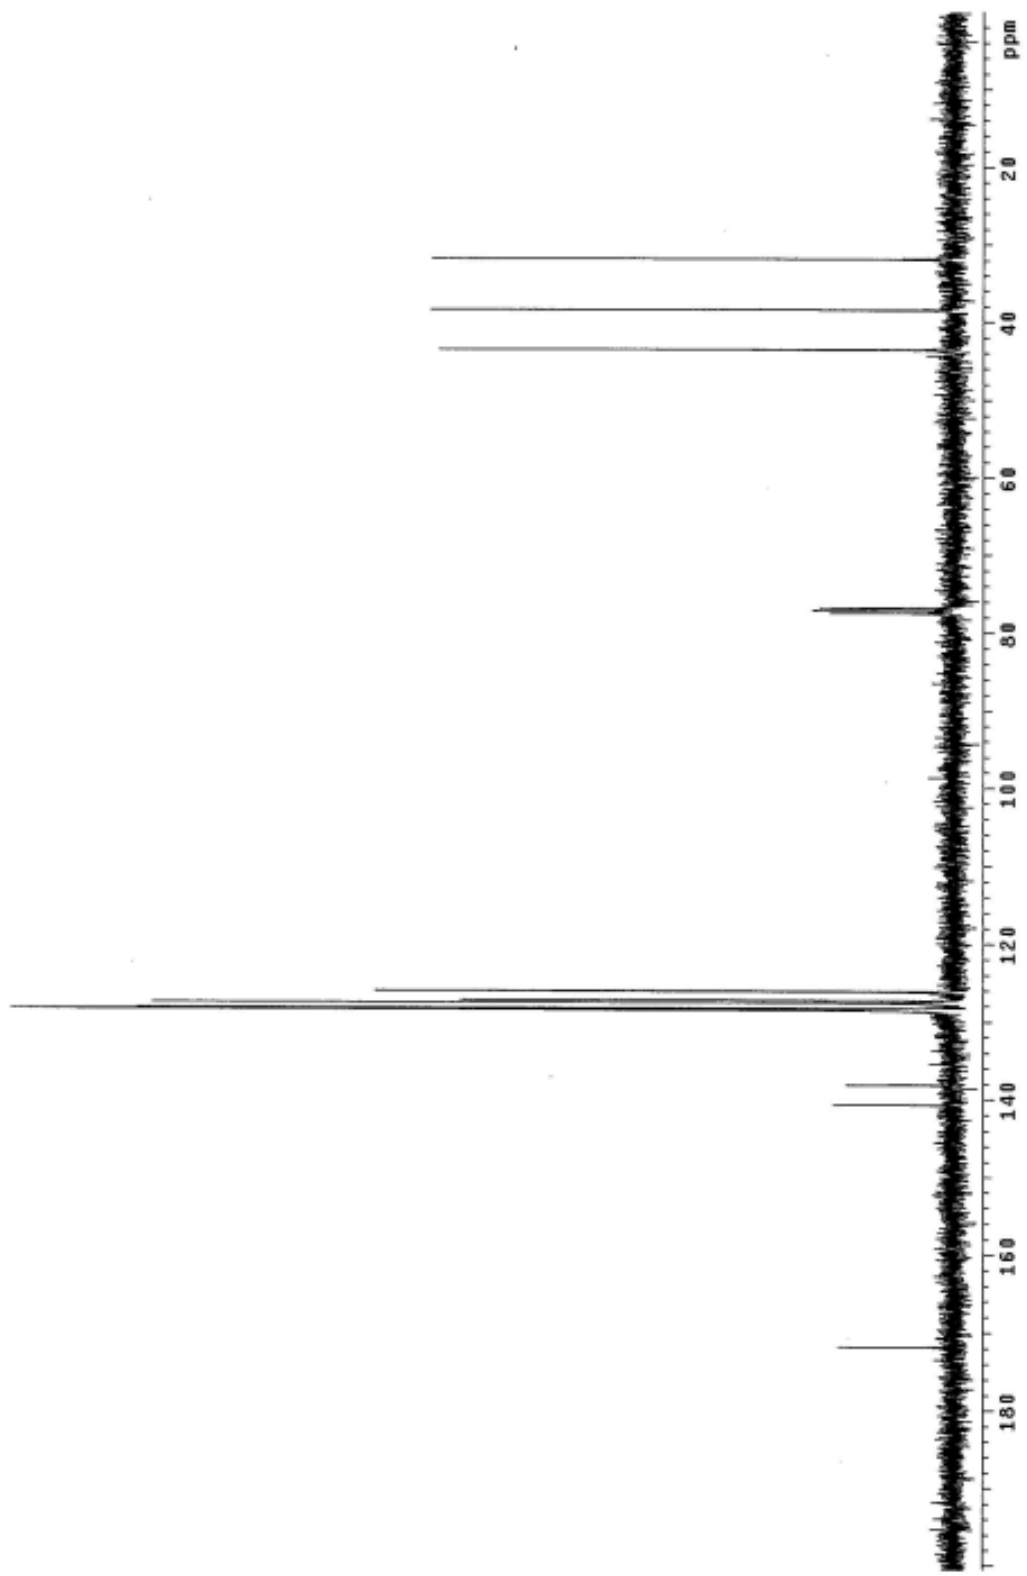



**N-benzyl-octanamide (14b):** The representative experimental procedure was applied to octanal (64.1mg, 0.5 mmol) and benzylamine (109.2 mg, 1.0 mmol) to yield **14b** (42.8 mg, 38 %)

**<sup>1</sup>H NMR** (400 MHz, CDCl<sub>3</sub>): δ 7.32 (m, 2H), 7.26 (m, 2H), 5.95 (s, 1H), 4.41 (d, 2H, *J* = 5.6 Hz), 2.19 (t, 2H, *J* = 7.6 Hz), 1.63 (m, 2H), 1.27 (m, 8H), 0.87 (t, 3H, *J* = 6.4 Hz) ppm

**<sup>13</sup>C NMR** (100 MHz, CDCl<sub>3</sub>): δ 173.0, 138.4, 128.6, 127.7, 127.4, 43.7, 36.9, 31.9, 29.5, 29.2, 26.0, 22.8, 14.3 ppm

**IR** (neat, cm<sup>-1</sup>): 3294, 2928, 1657, 1632, 1265

**HRMS:** C<sub>15</sub>H<sub>23</sub>NO Calcd : 233.1780, [M]<sup>+</sup> Found : 233.1781

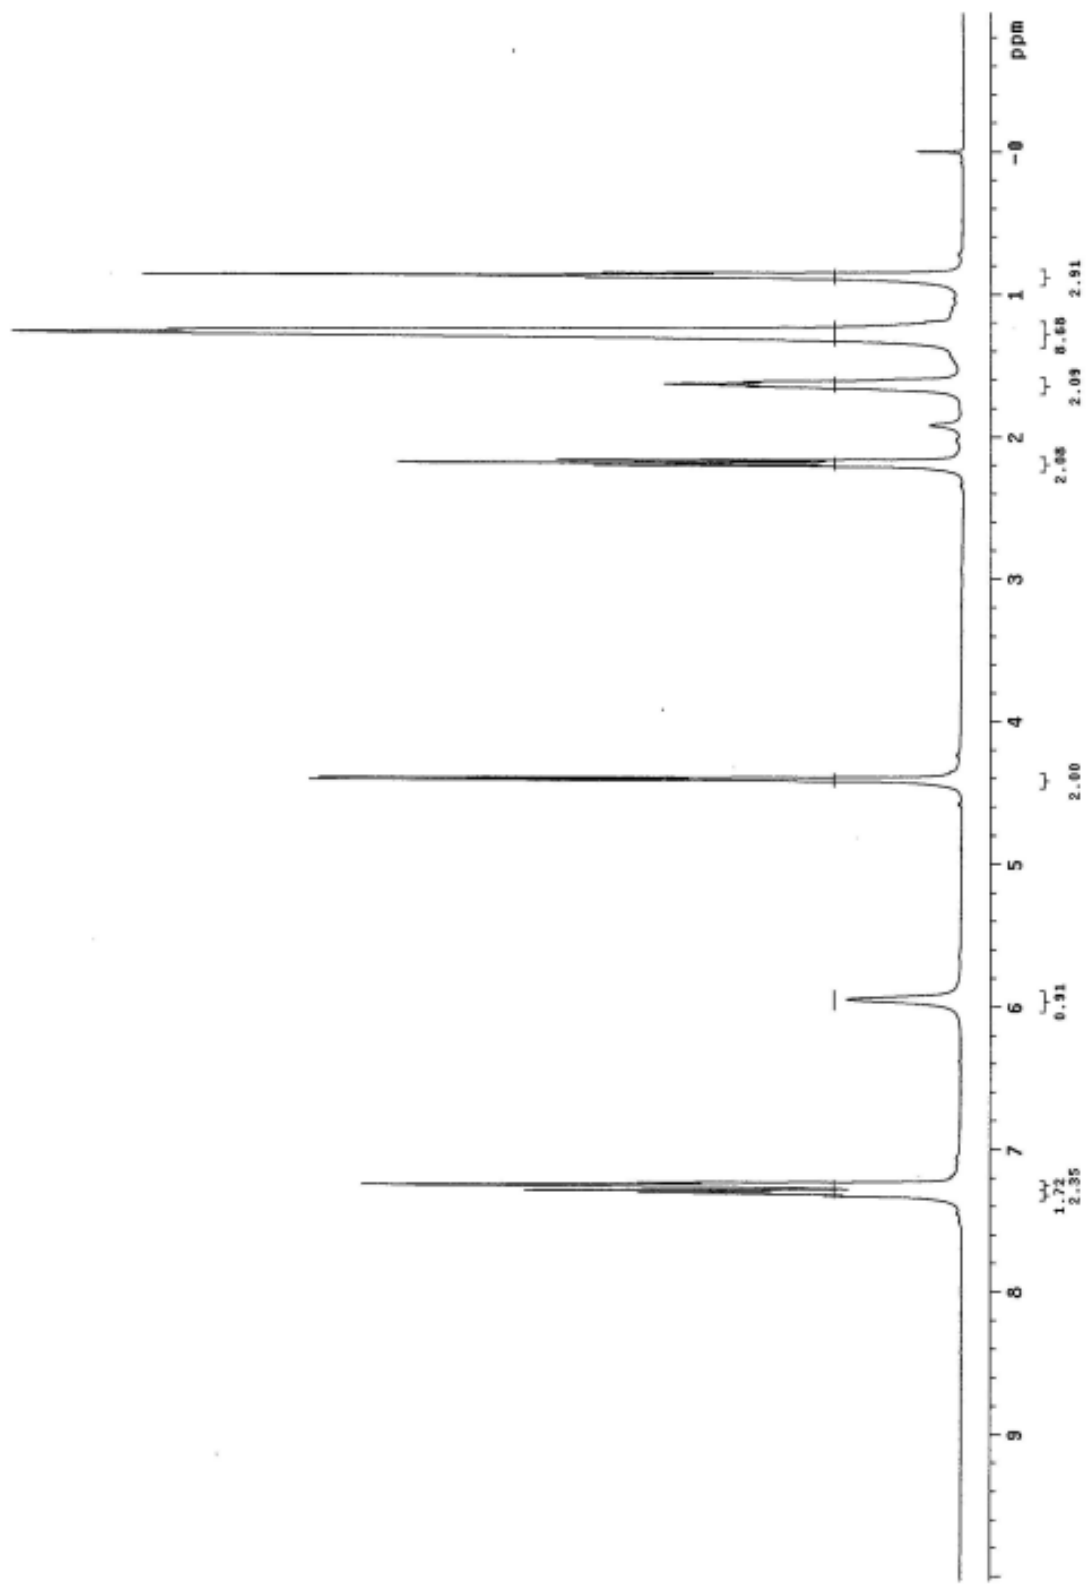

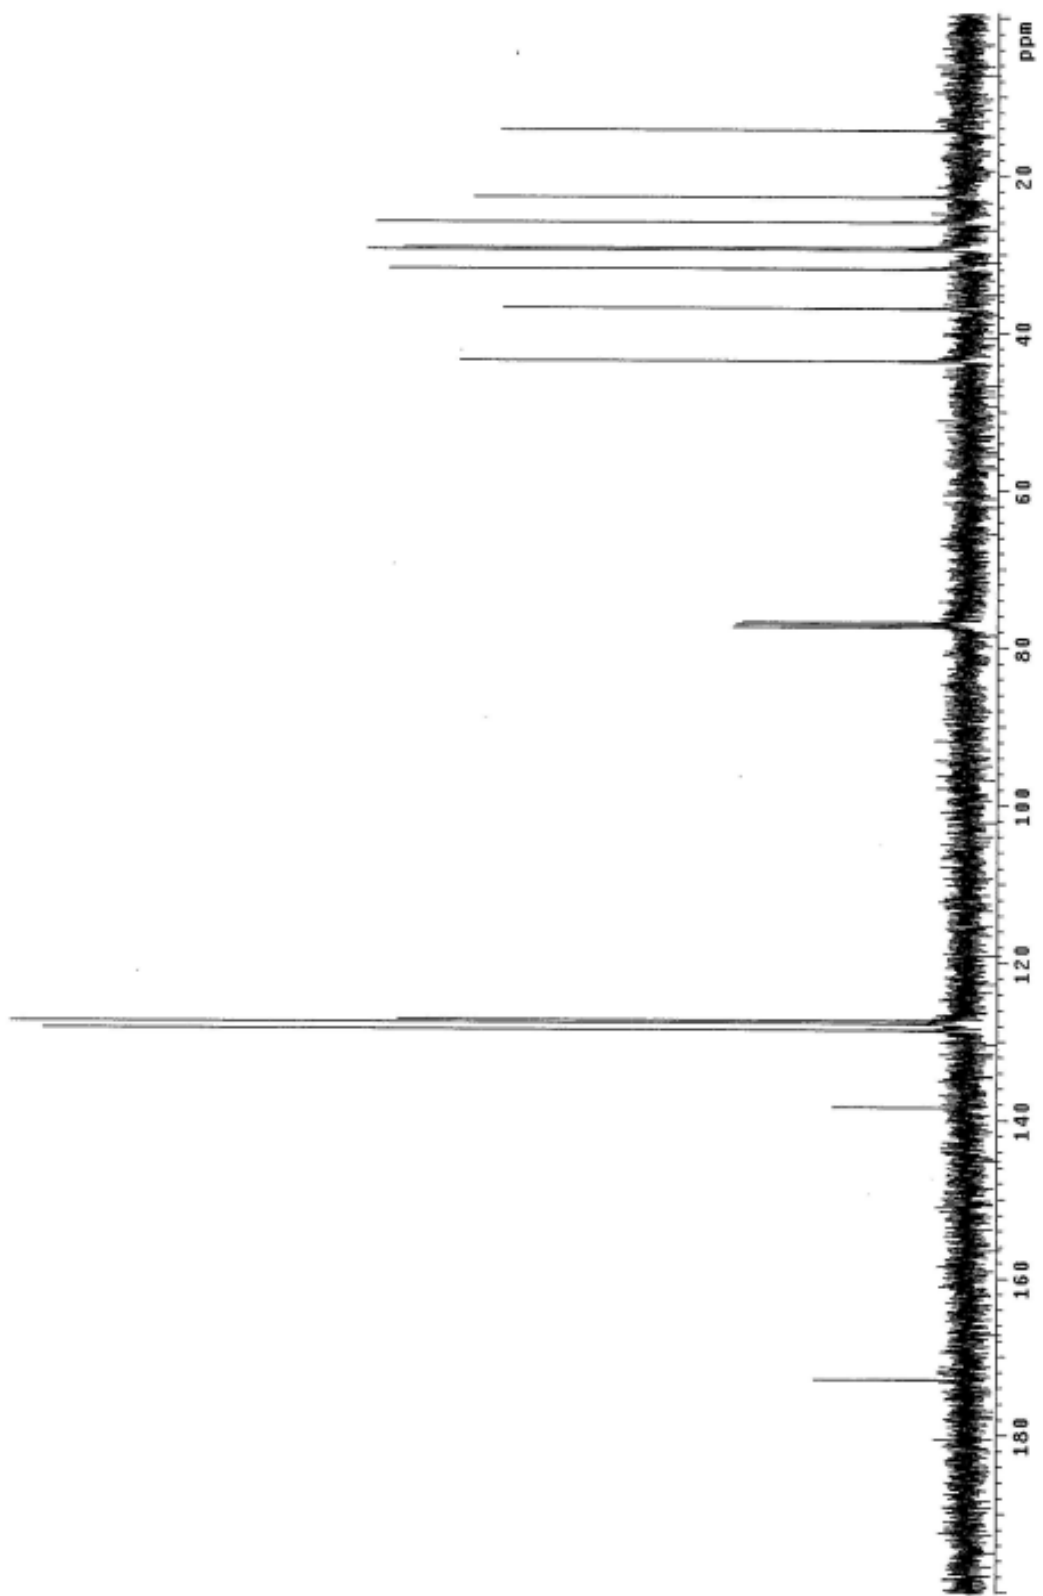

Supplement: c4ra04012k1.pdf [file c4ra04012k1.pdf]
